# Supplementary material for: Mint3-depletion-induced energy stress sensitizes triple-negative breast cancer to chemotherapy via HSF1 inactivation
Source: PubMed Central journal article supplement (PMC10713533; doi:10.1038/s41419-023-06352-4), 2023-12-11

**Fig. 1**

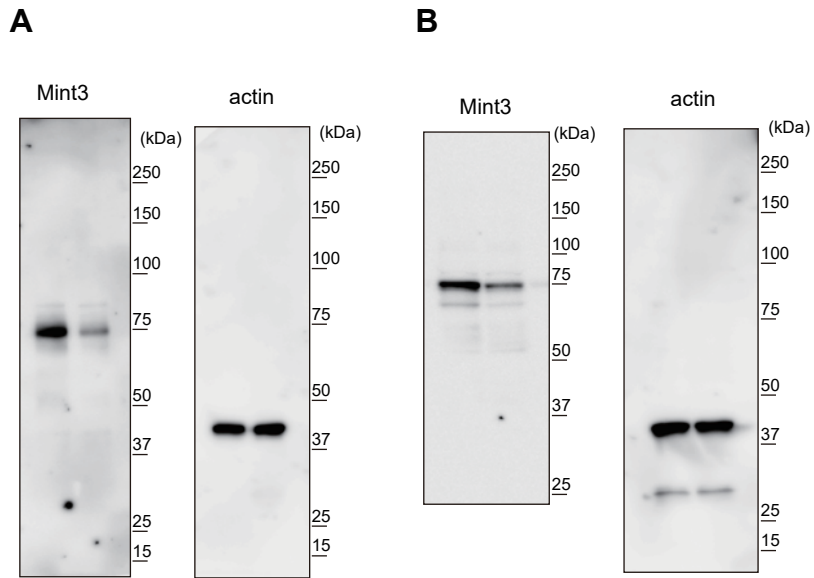

**Fig. 3**

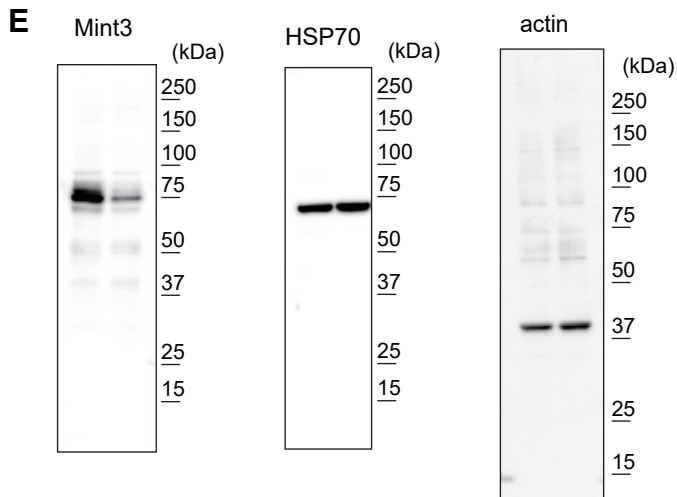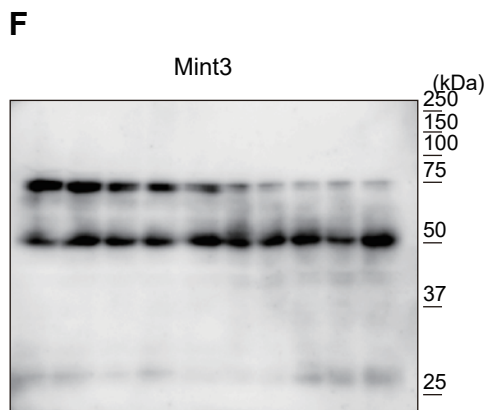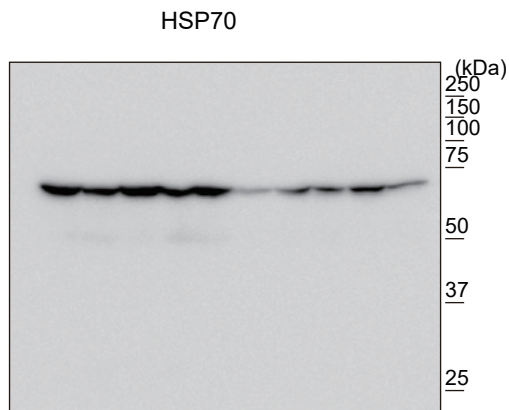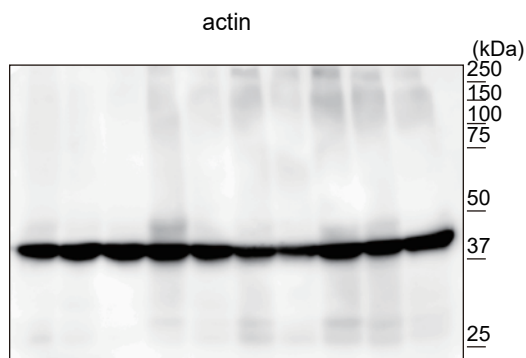

**Fig. 3**

**G**

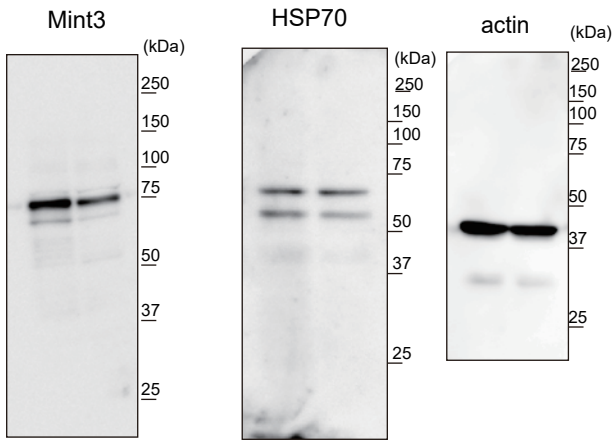

**H**

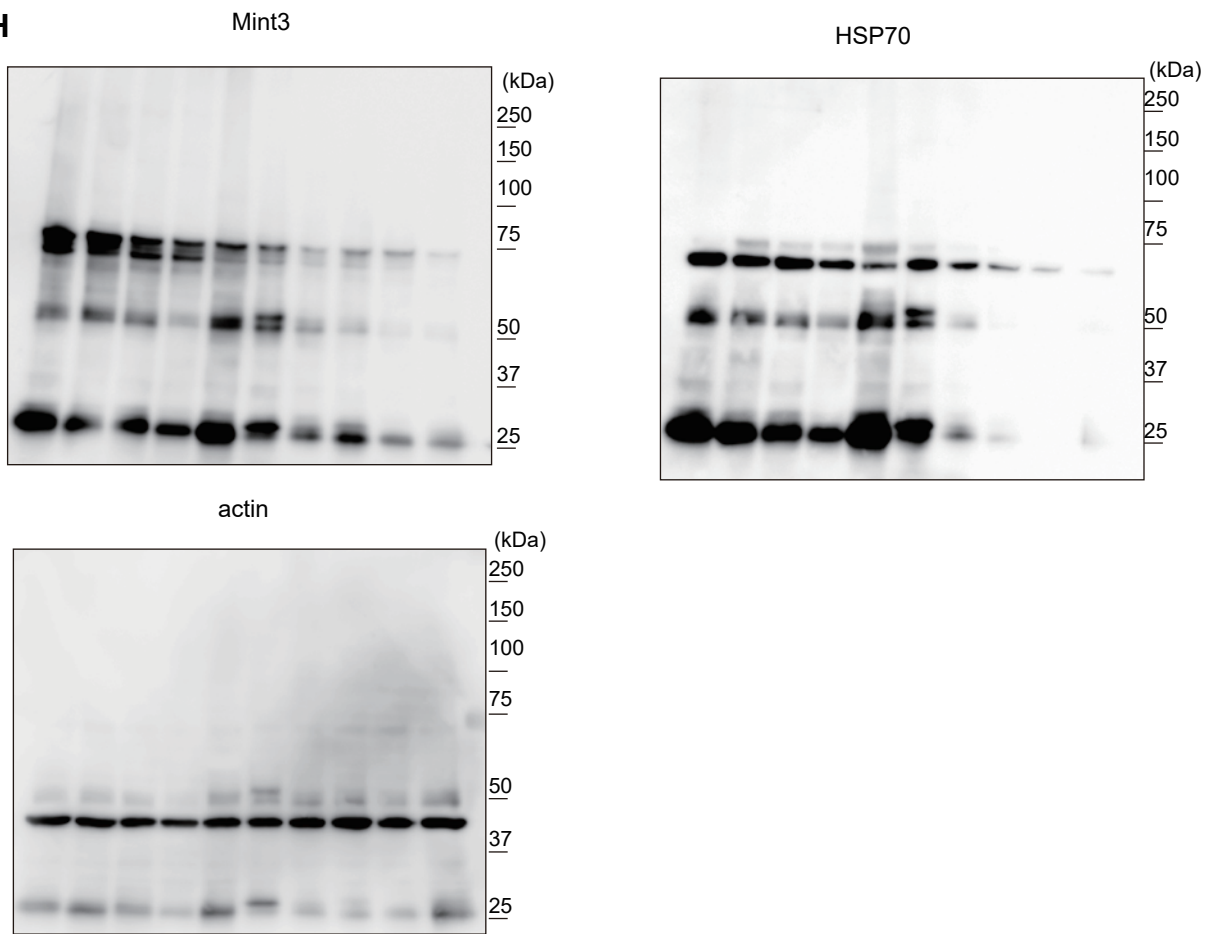

**Fig. 5**

**A**

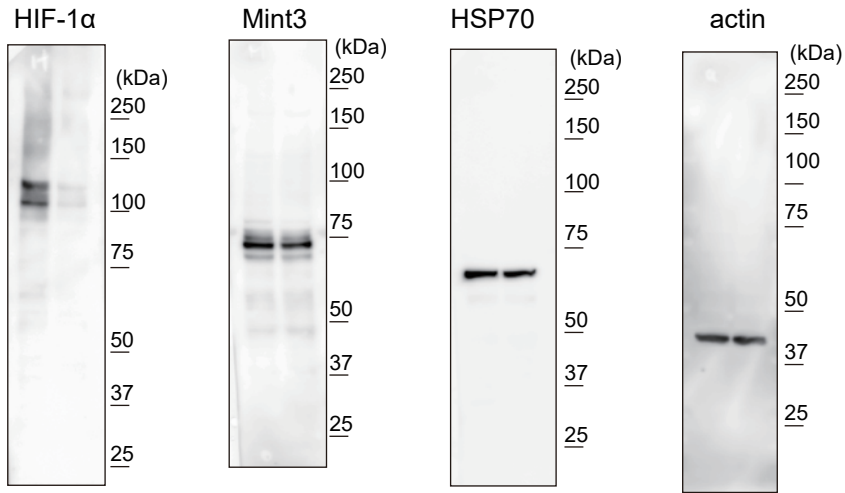

**B**

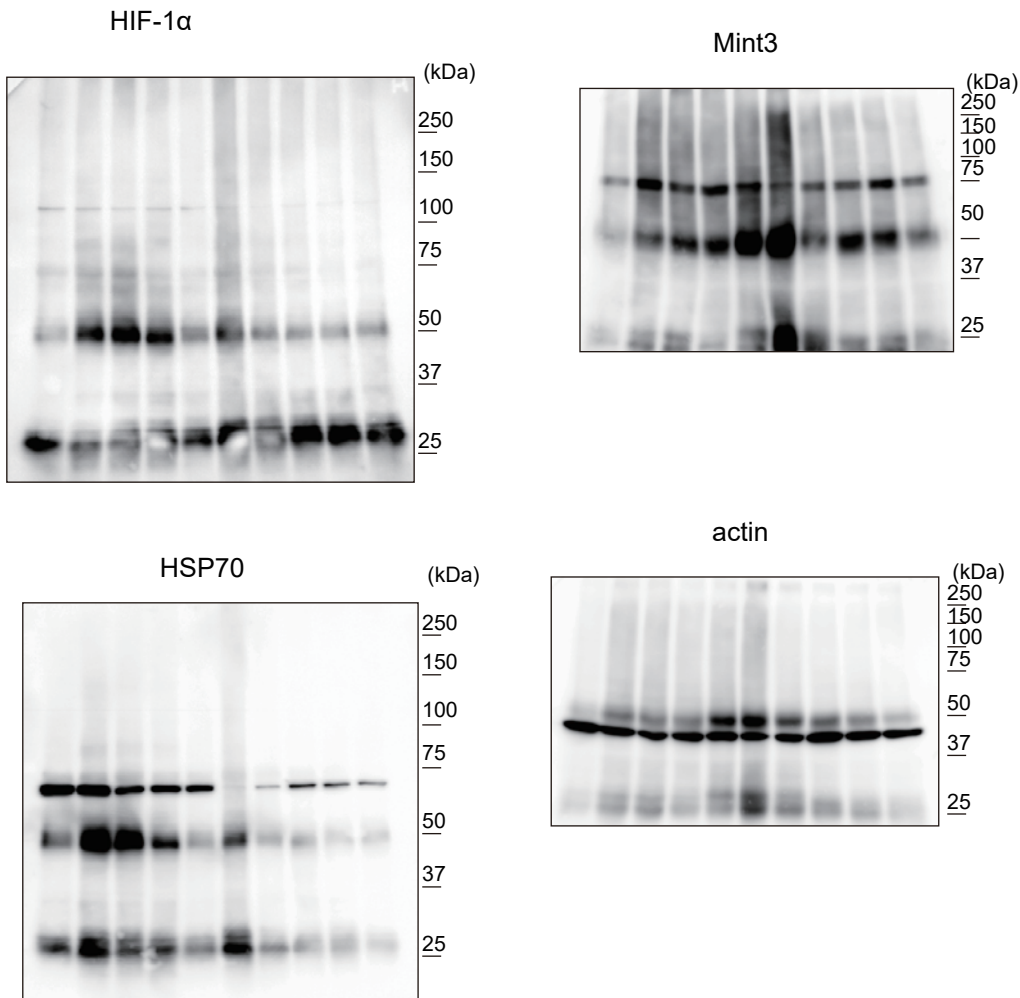

**Fig. 6**

**G**

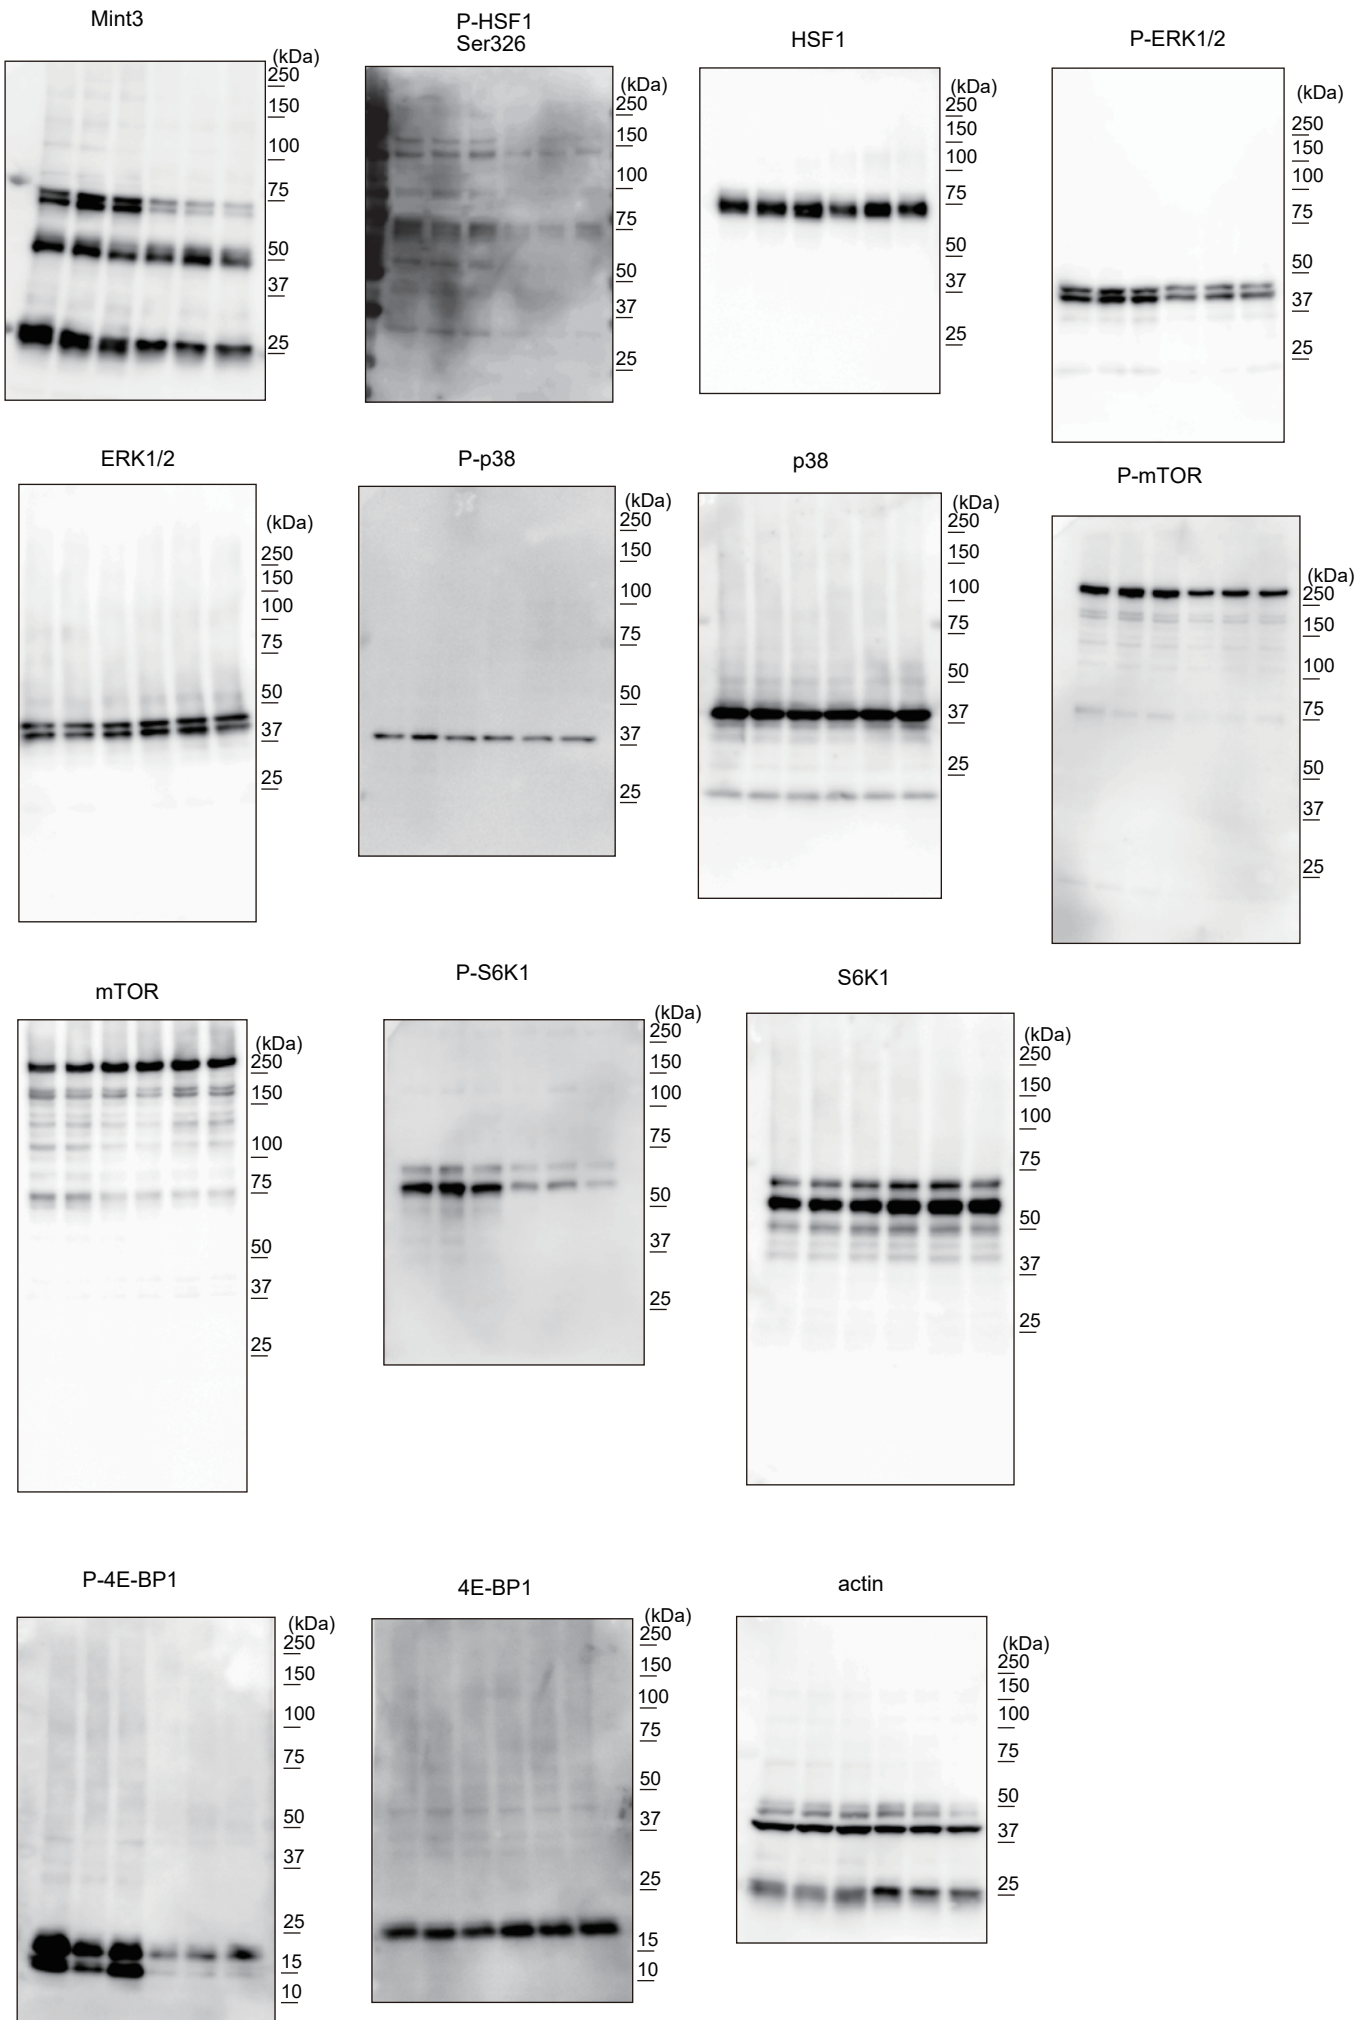

**Fig. 6**

**H**

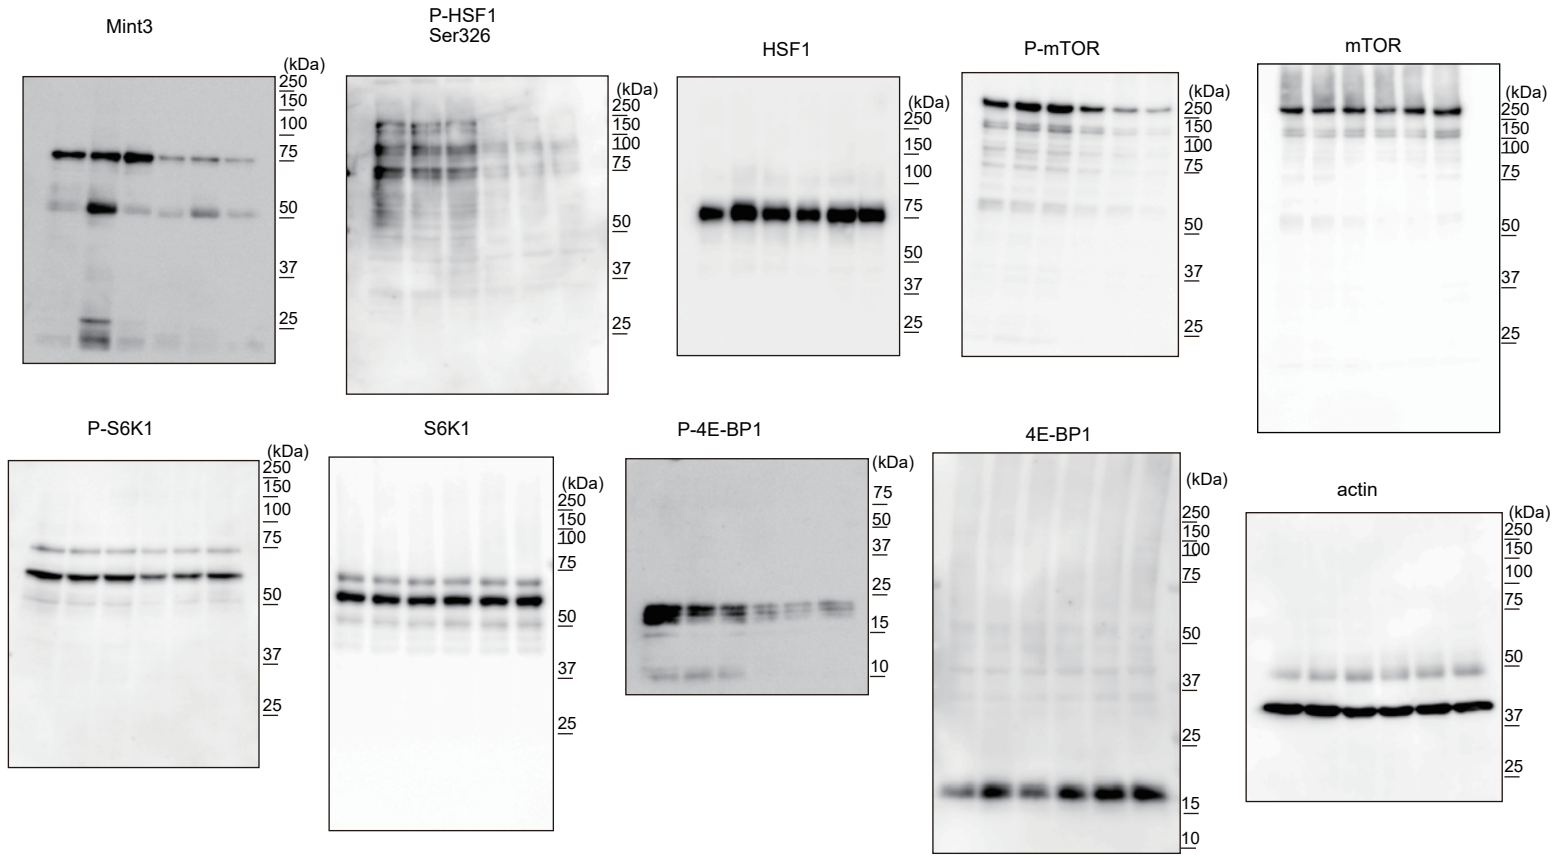

**I**

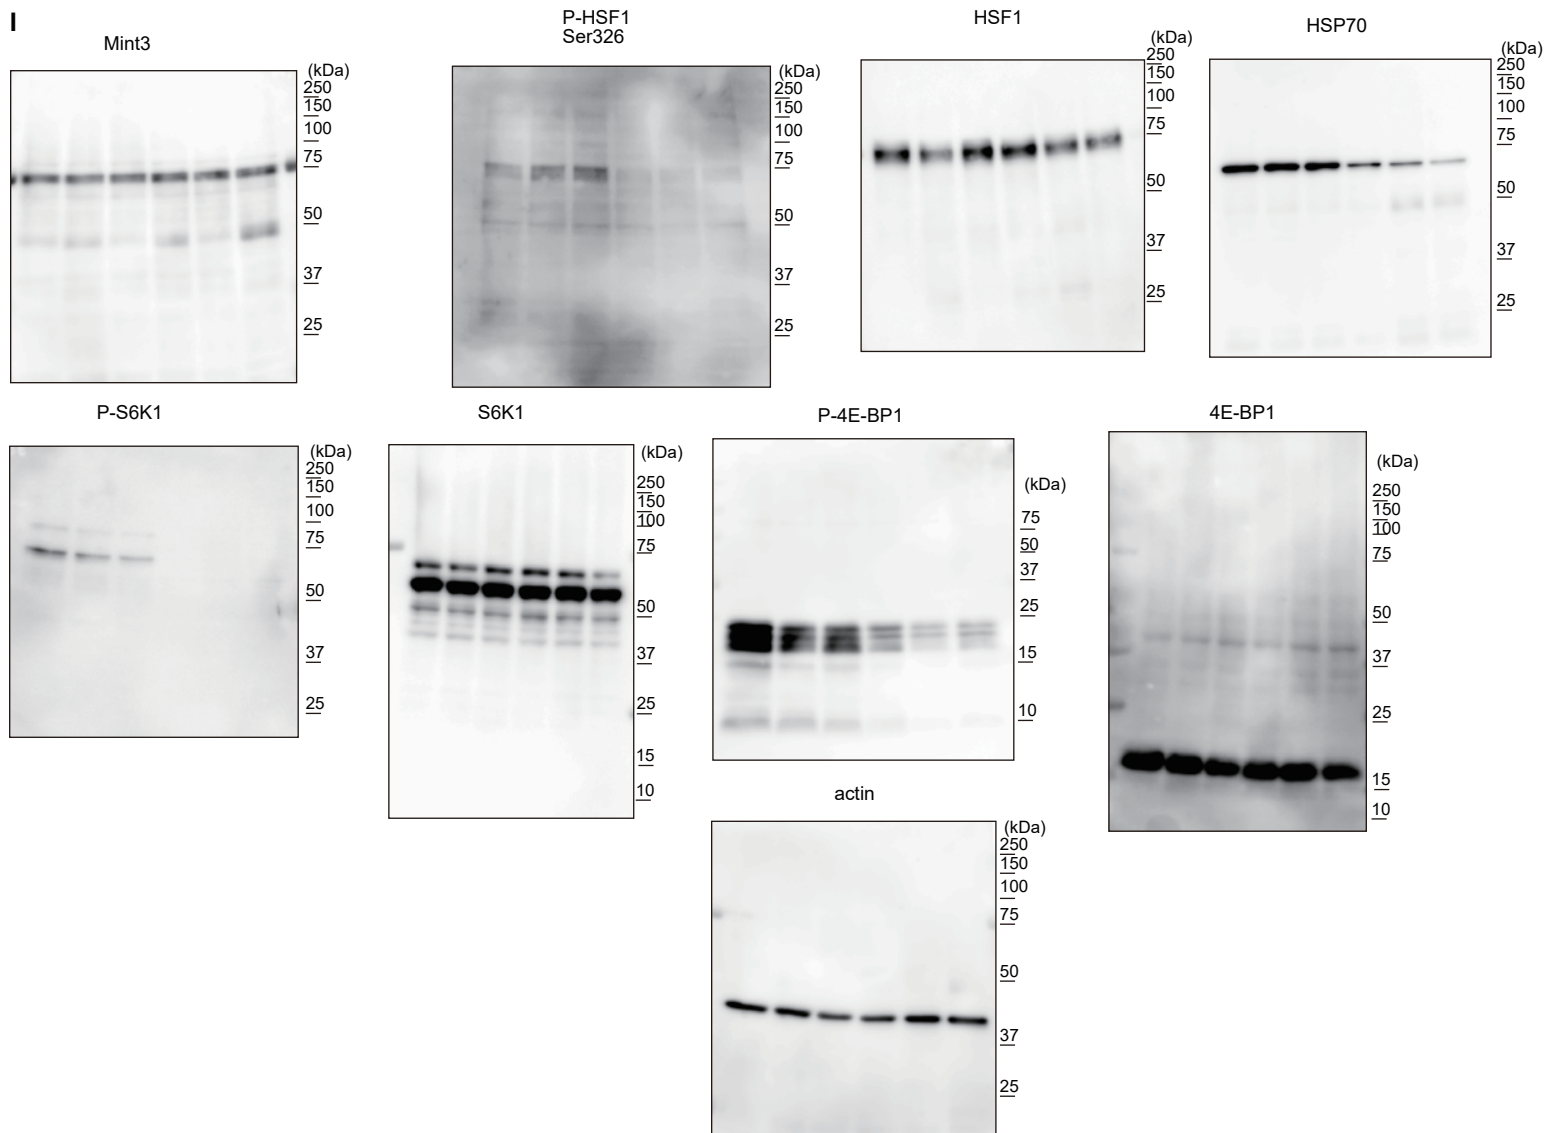



**Fig. 7**  
**G**

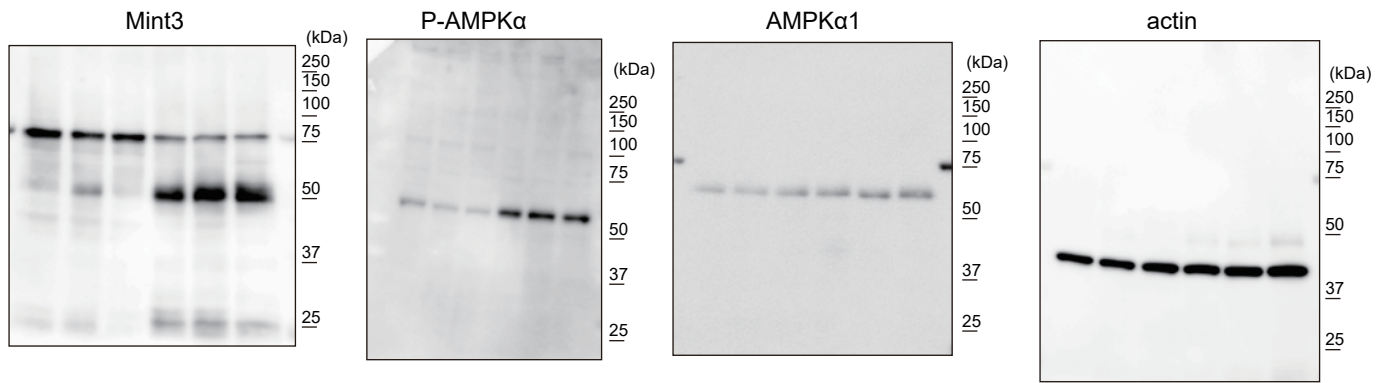

**H**

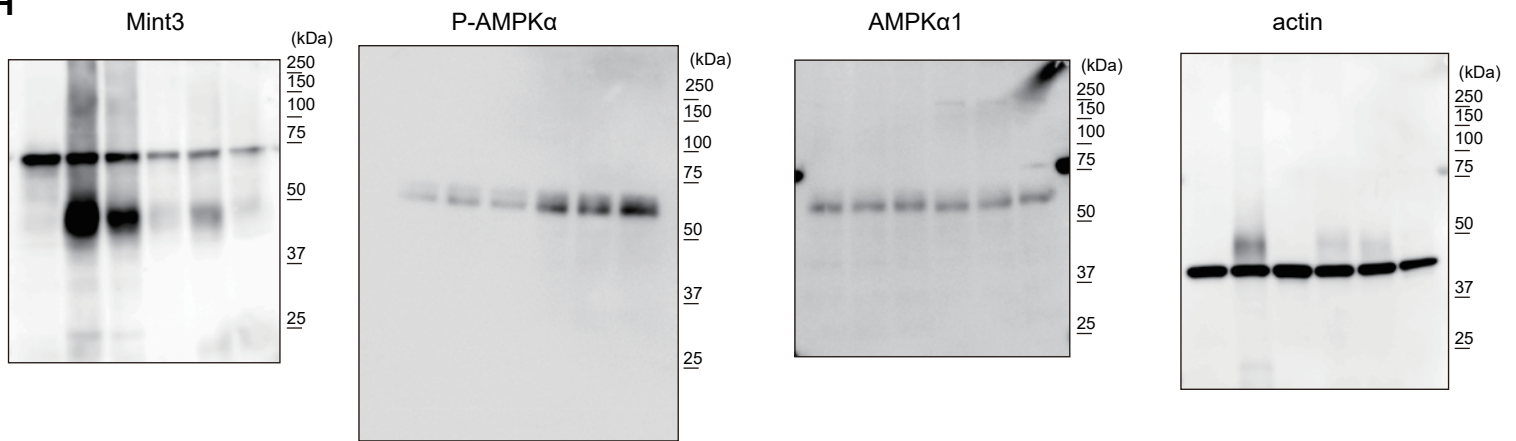

**L**

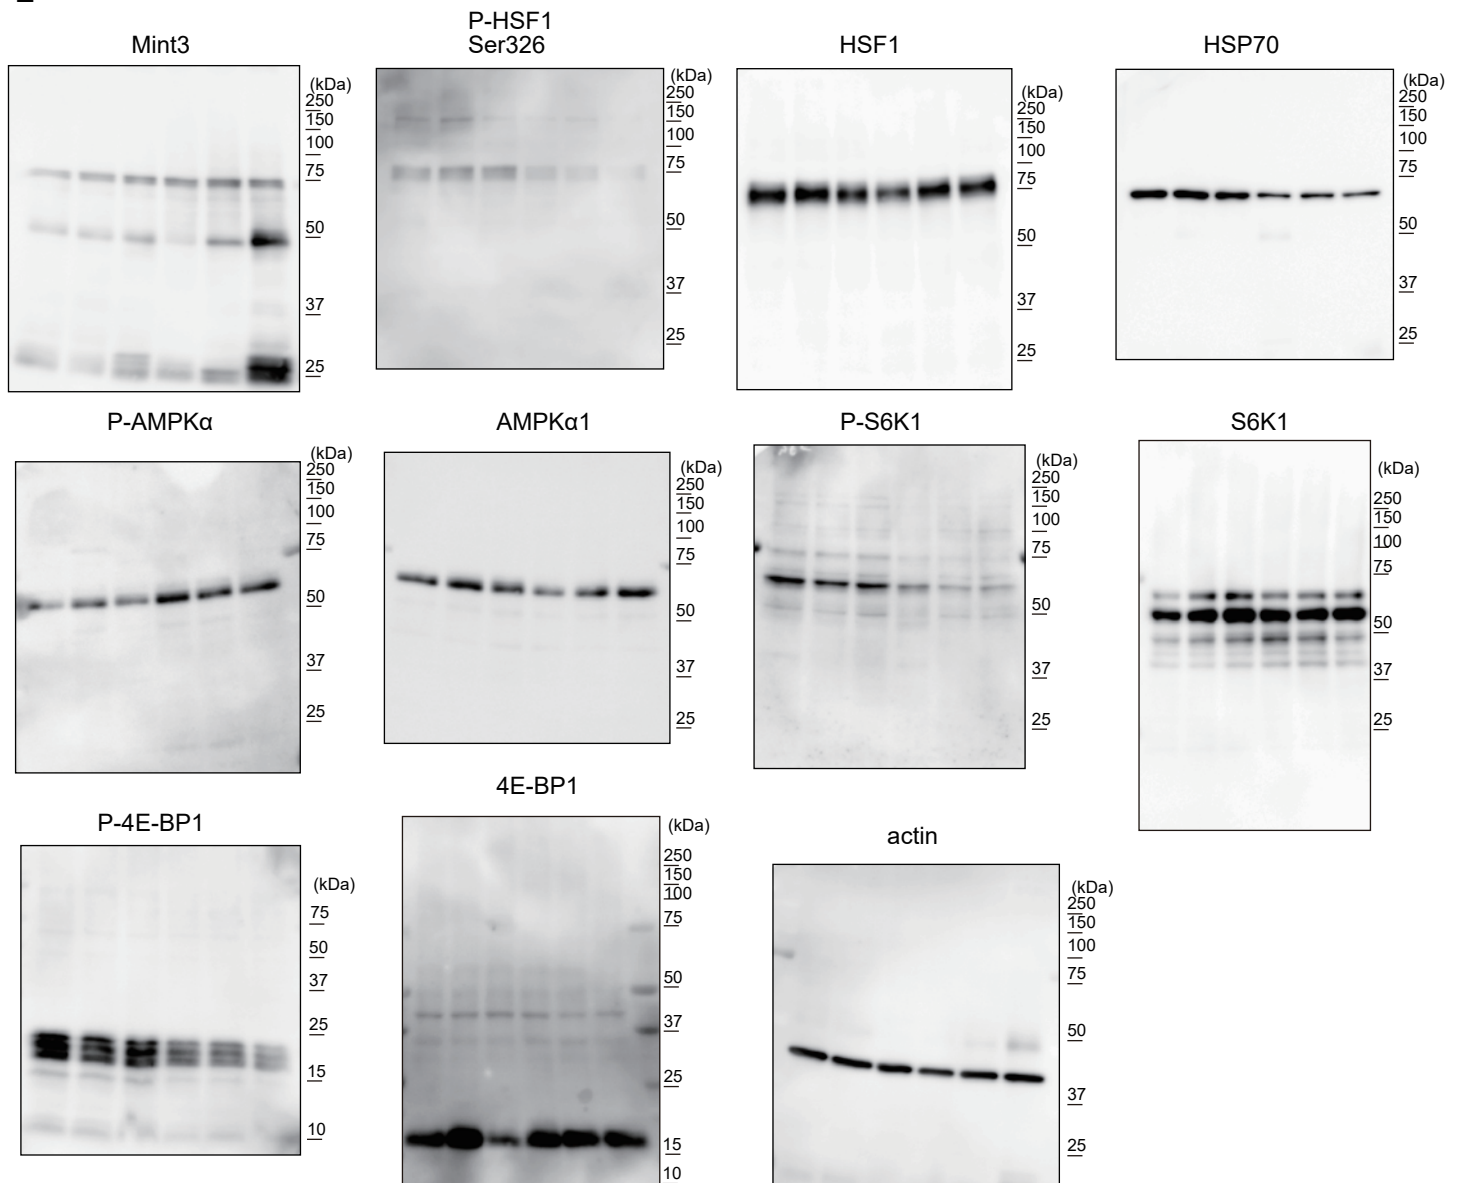

Supplementary Fig. S1.

**A**

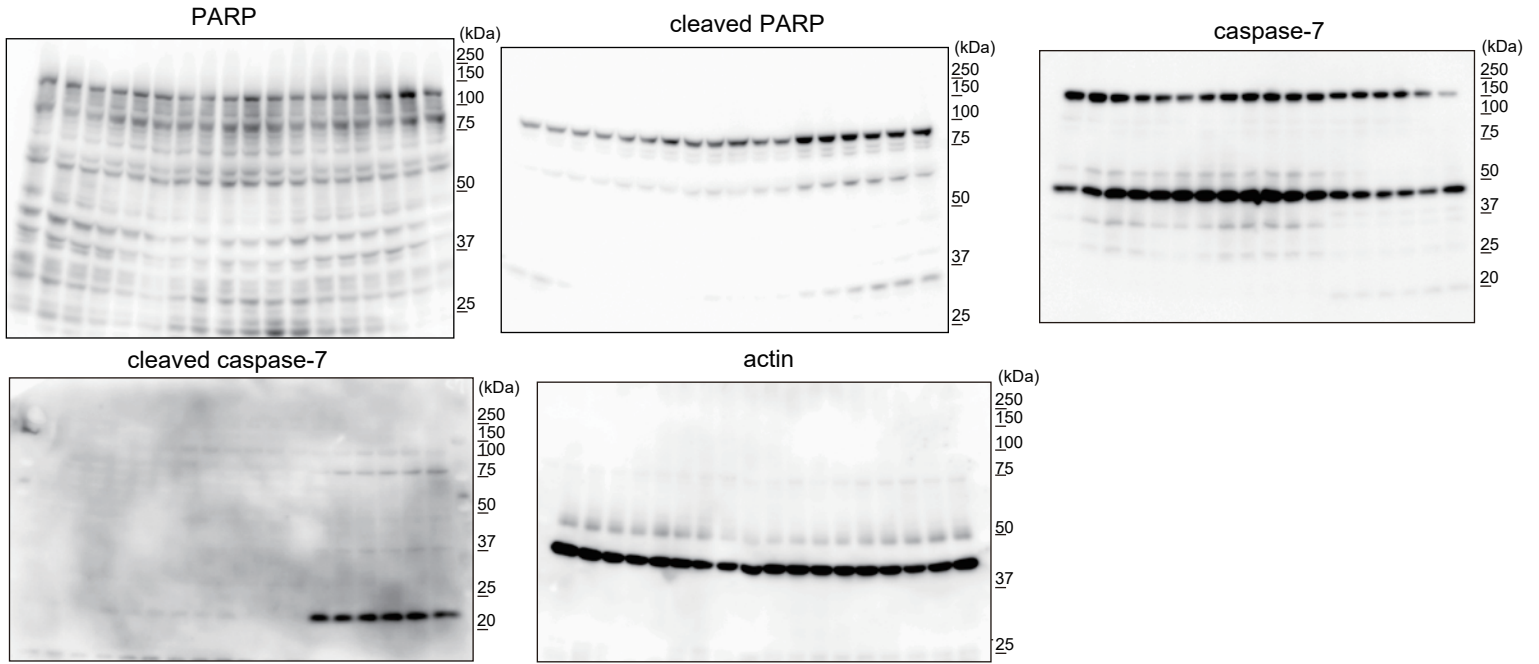

**B**

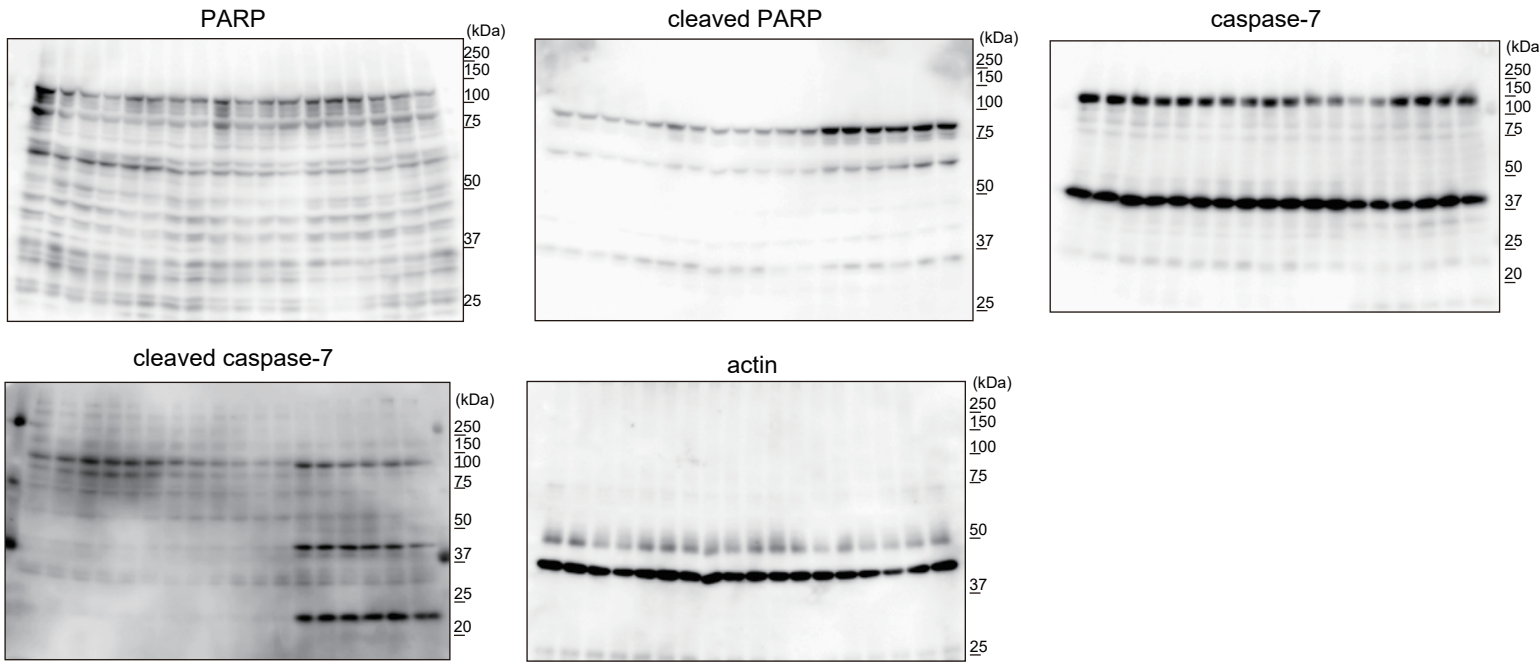

**C**

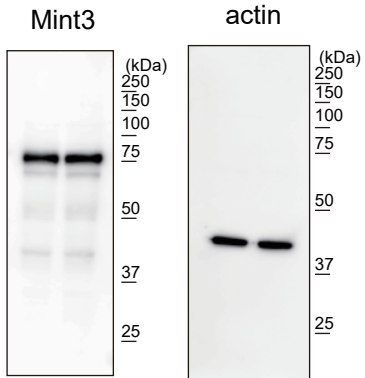

**D**

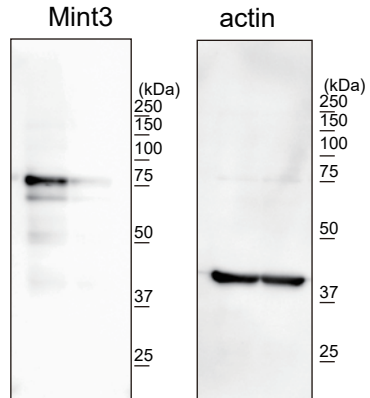

Supplementary Fig. S2.

D

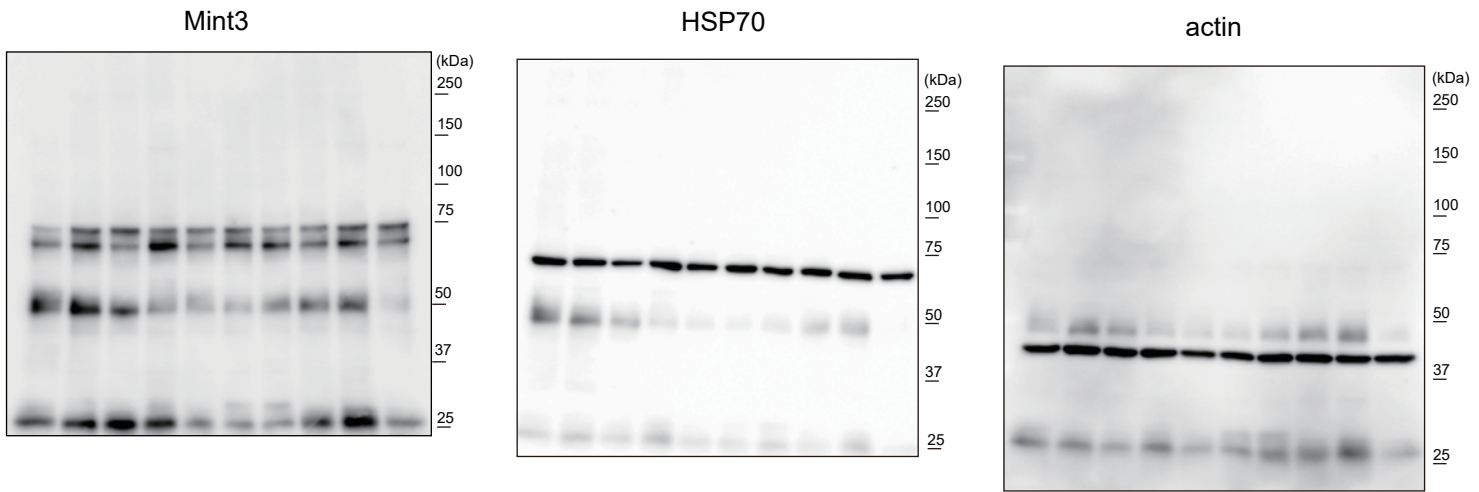

E

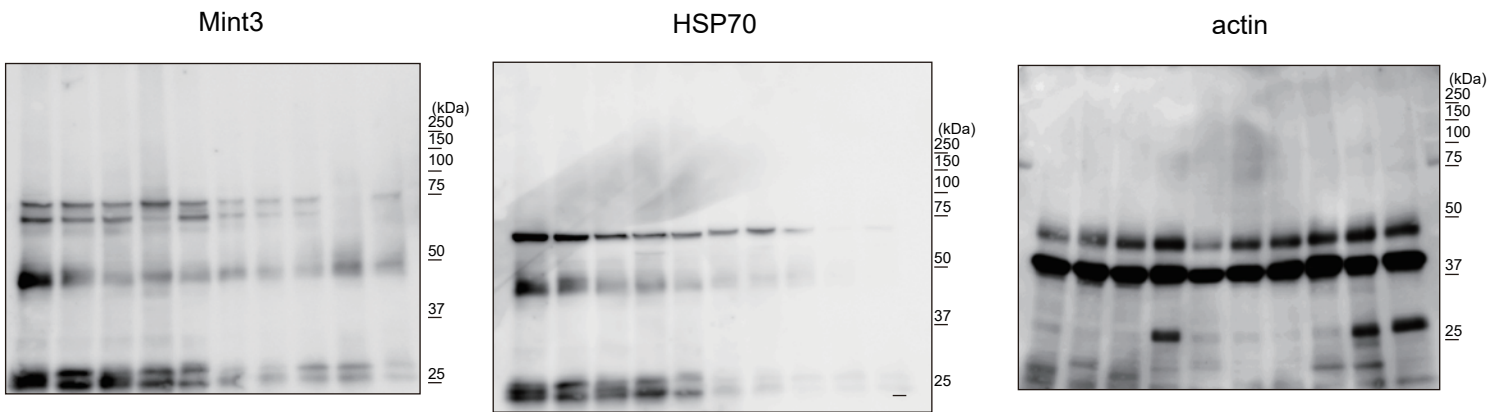

F

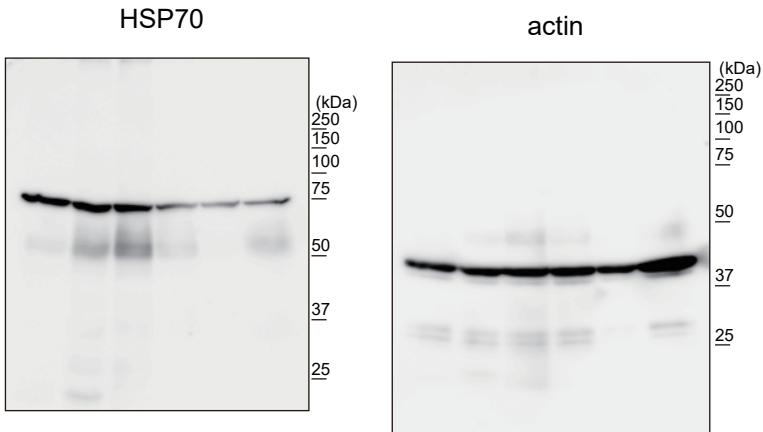



Supplementary Fig. S3

C

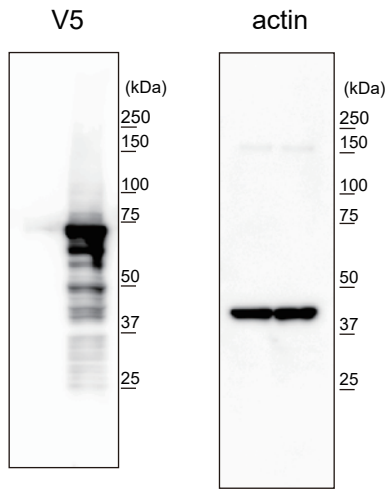

H

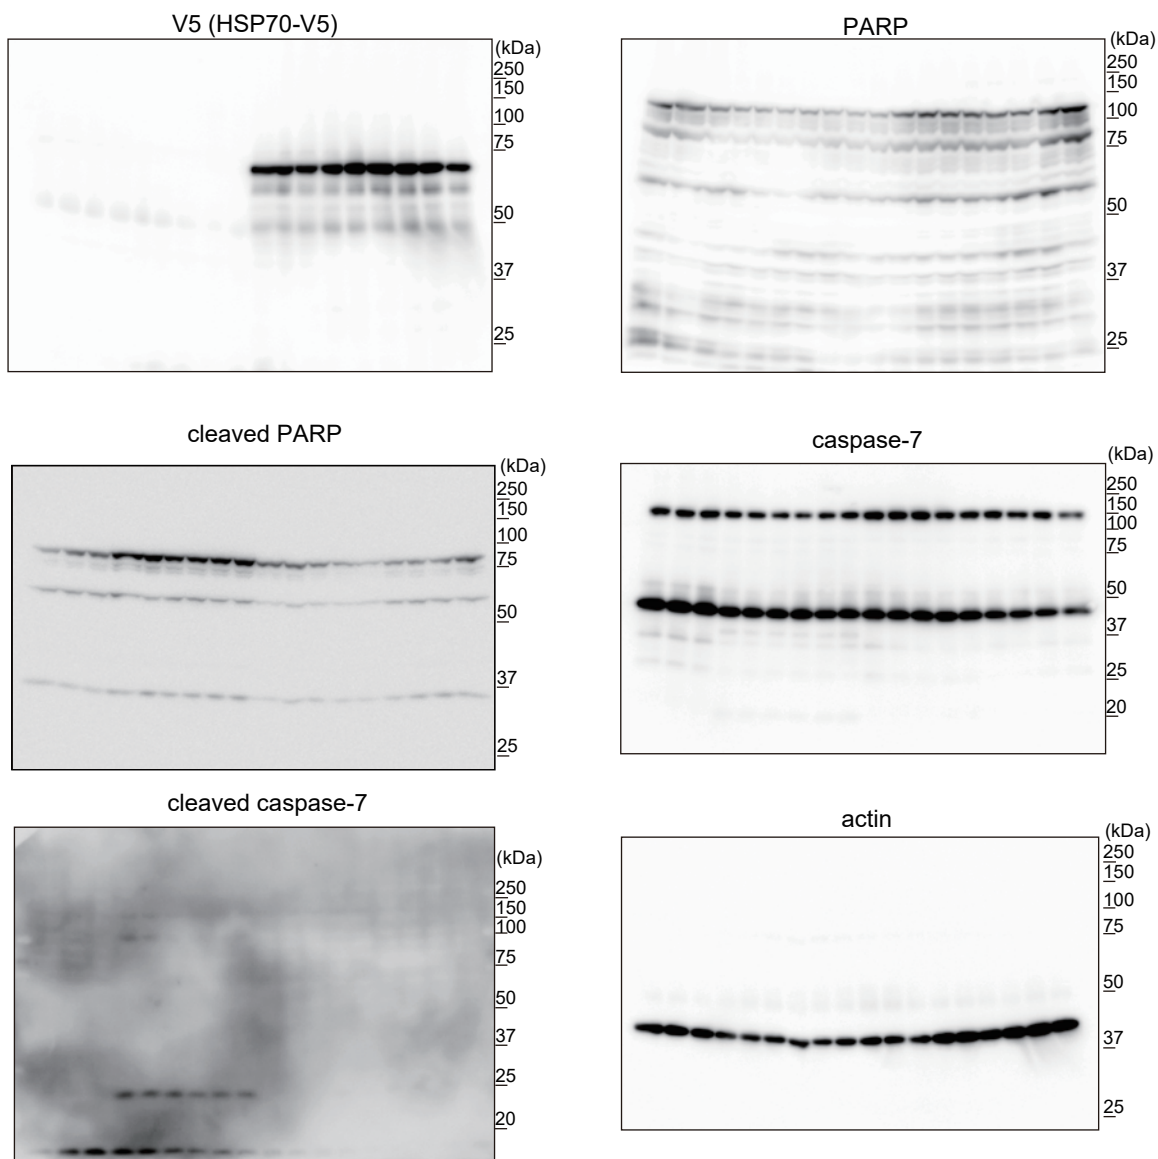

Supplementary Fig. S4.

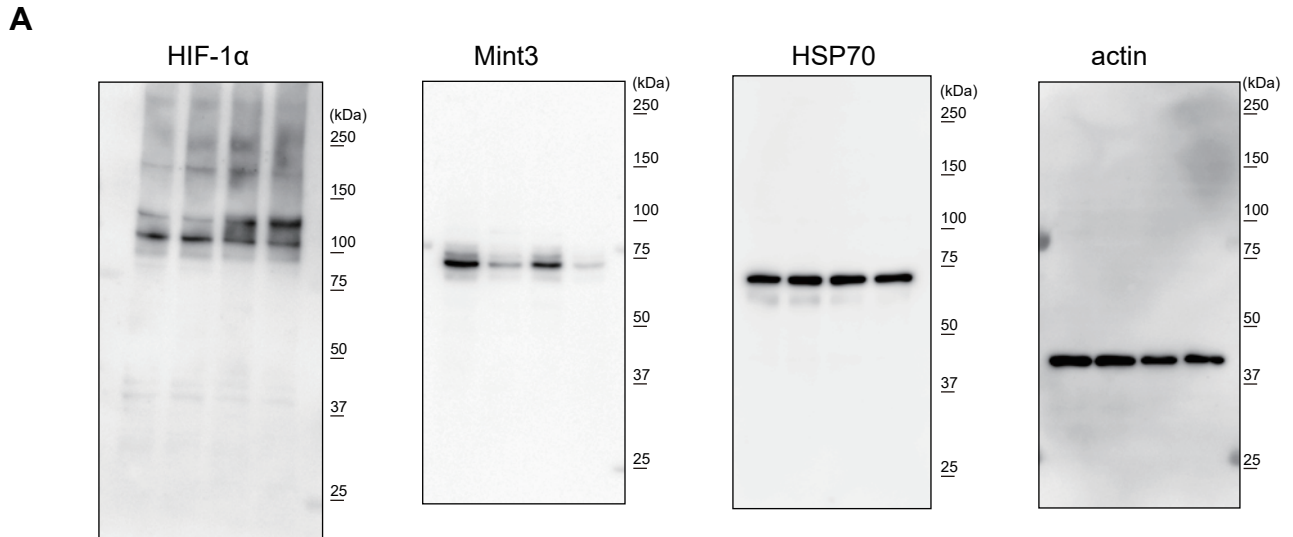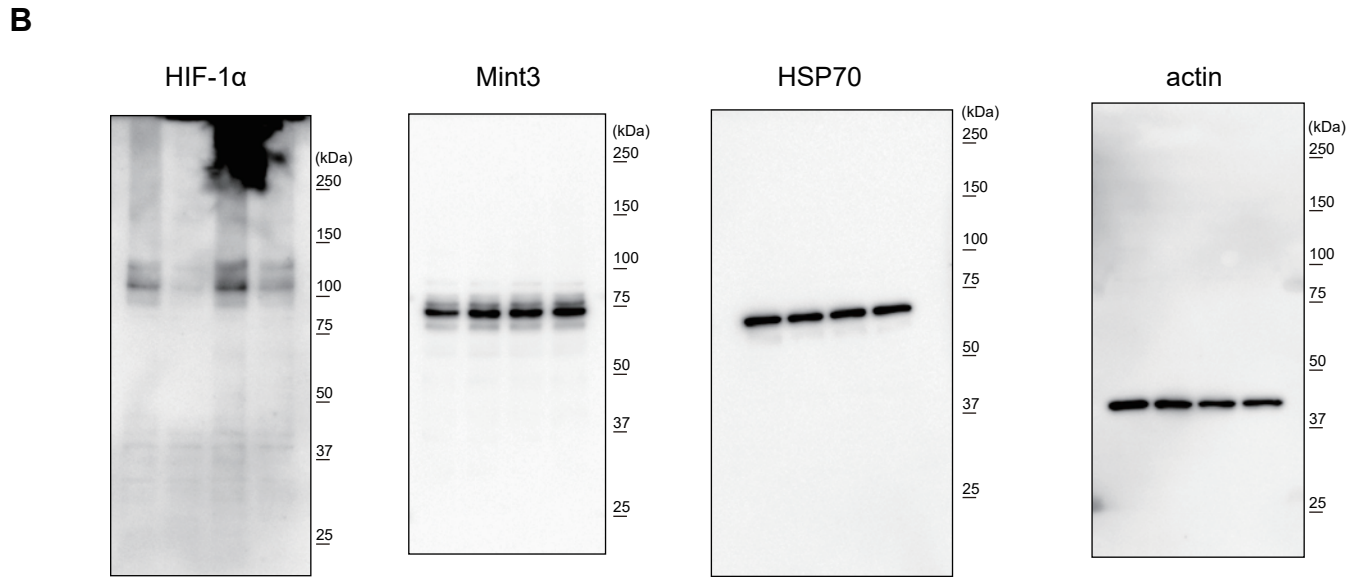

Supplementary Fig. S7

A

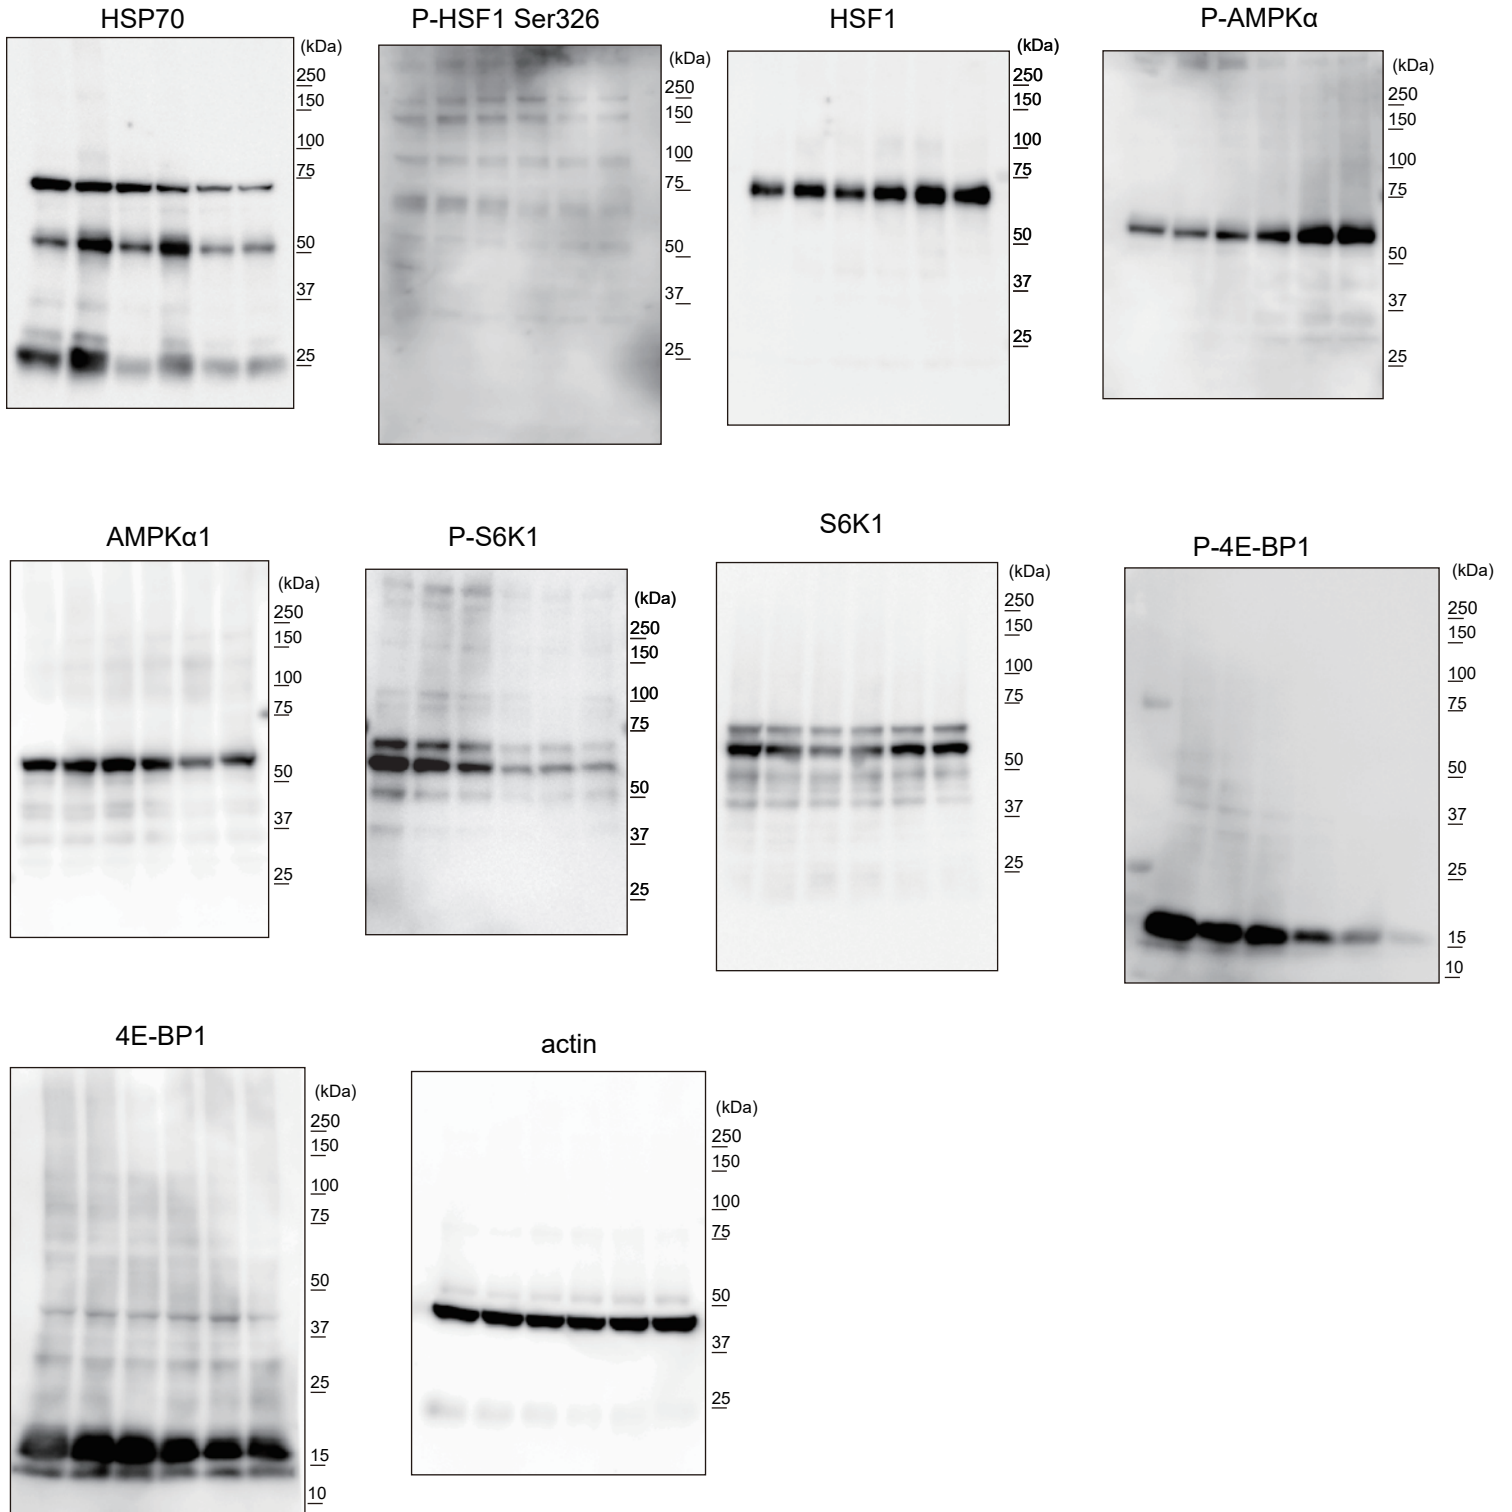

Supplementary Fig. S7

B

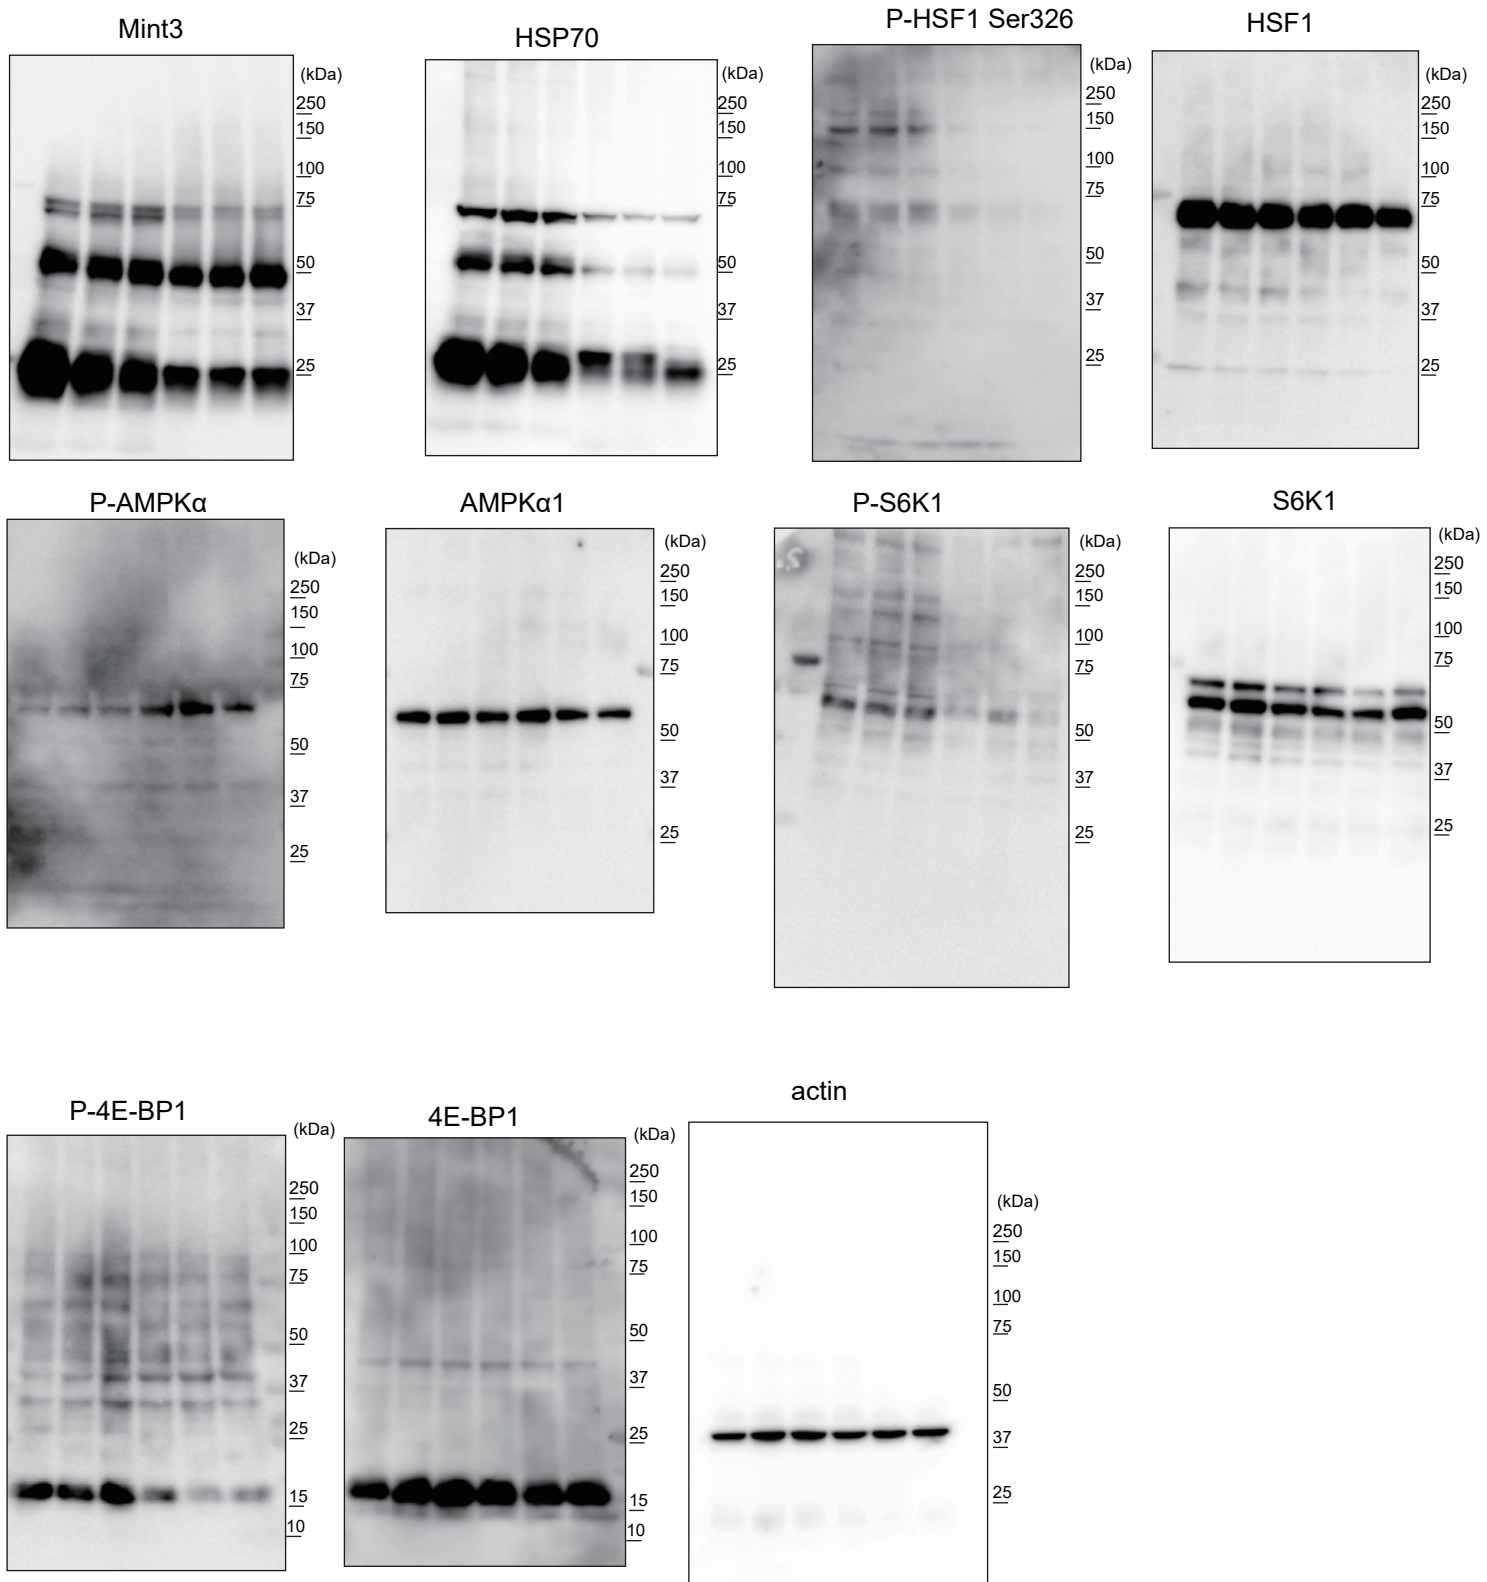



C

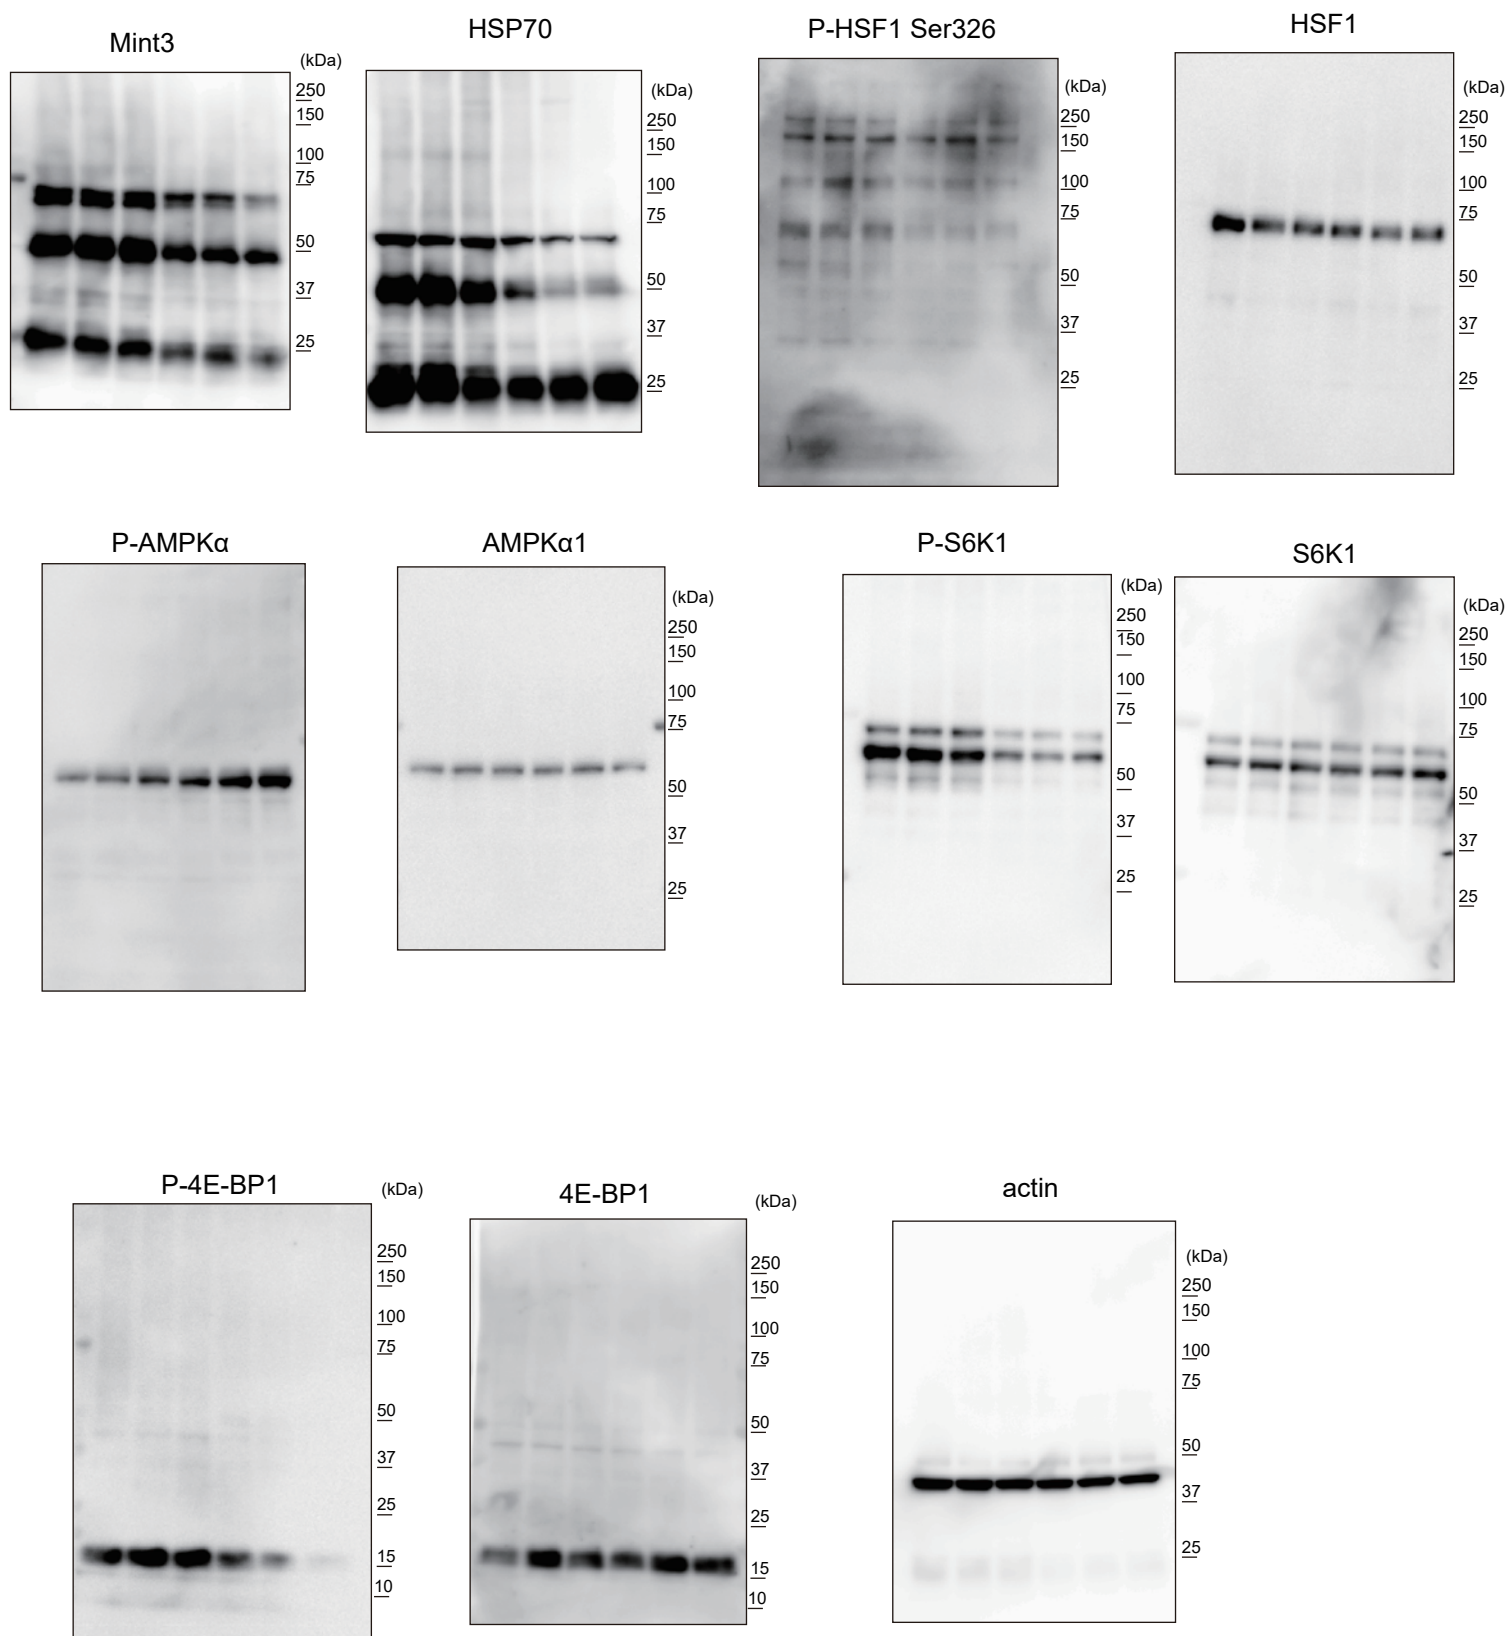

Supplementary Fig. S7

D

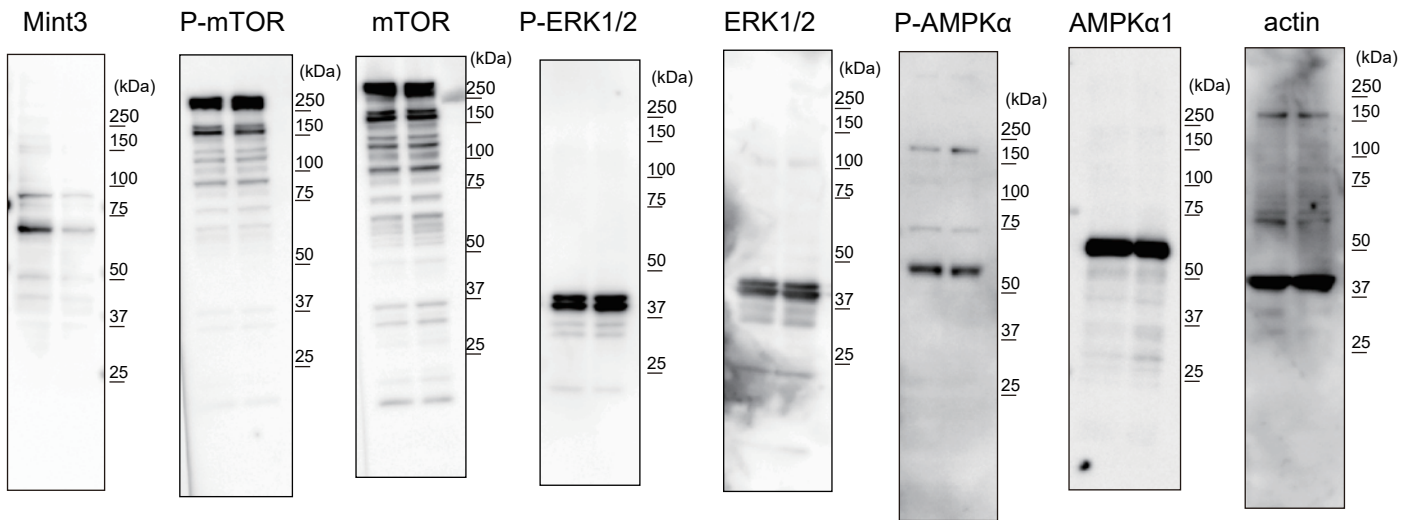

E

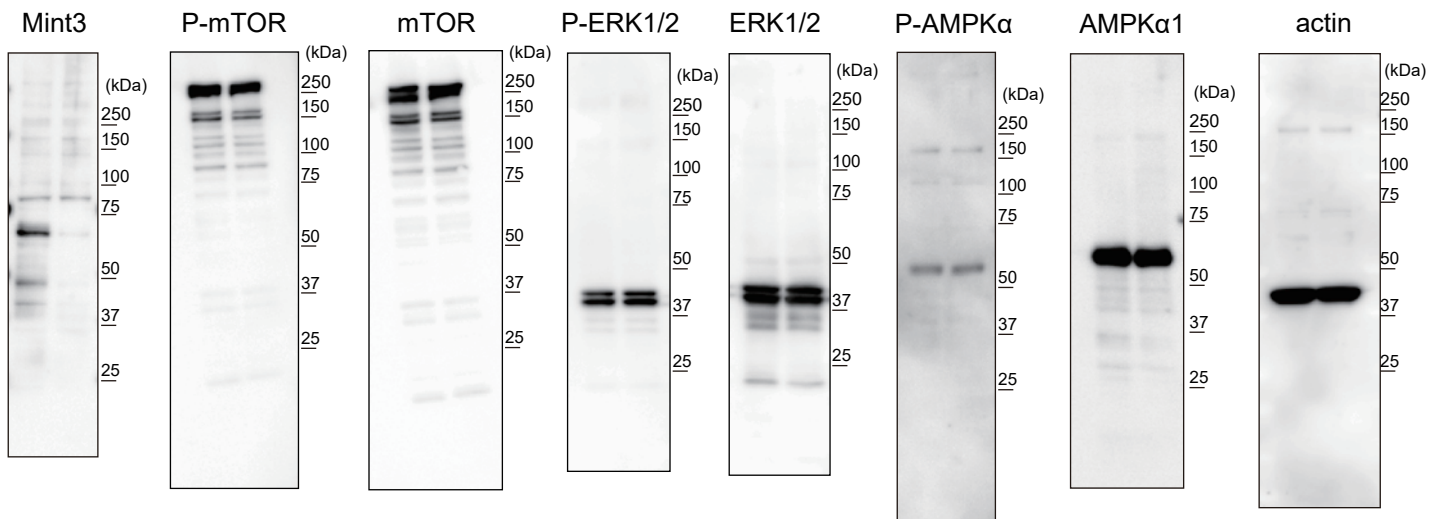

Supplementary Fig. S8

B

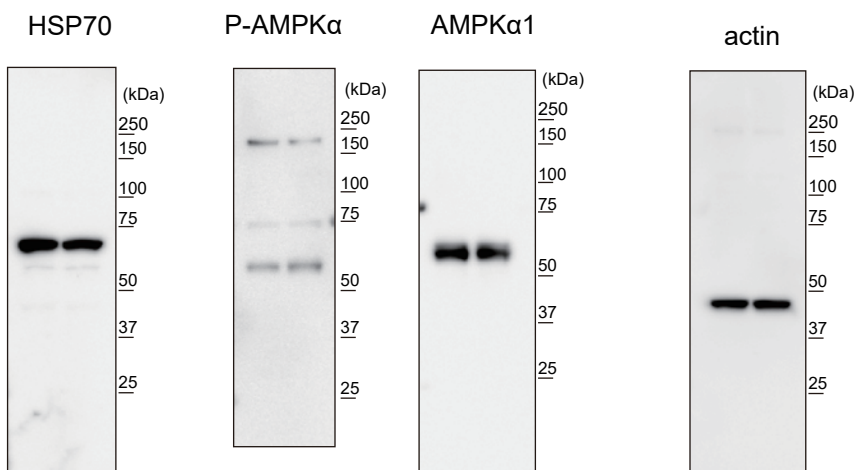

Supplement: 41419_2023_6352_MOESM12_ESM.pdf [file 41419_2023_6352_MOESM12_ESM.pdf]
