# Supplementary material for: Mint3-depletion-induced energy stress sensitizes triple-negative breast cancer to chemotherapy via HSF1 inactivation
Source: PubMed Central journal article supplement (PMC10713533; doi:10.1038/s41419-023-06352-4), 2023-12-11
Supplement: 41419_2023_6352_MOESM2_ESM.pdf [file 41419_2023_6352_MOESM2_ESM.pdf]

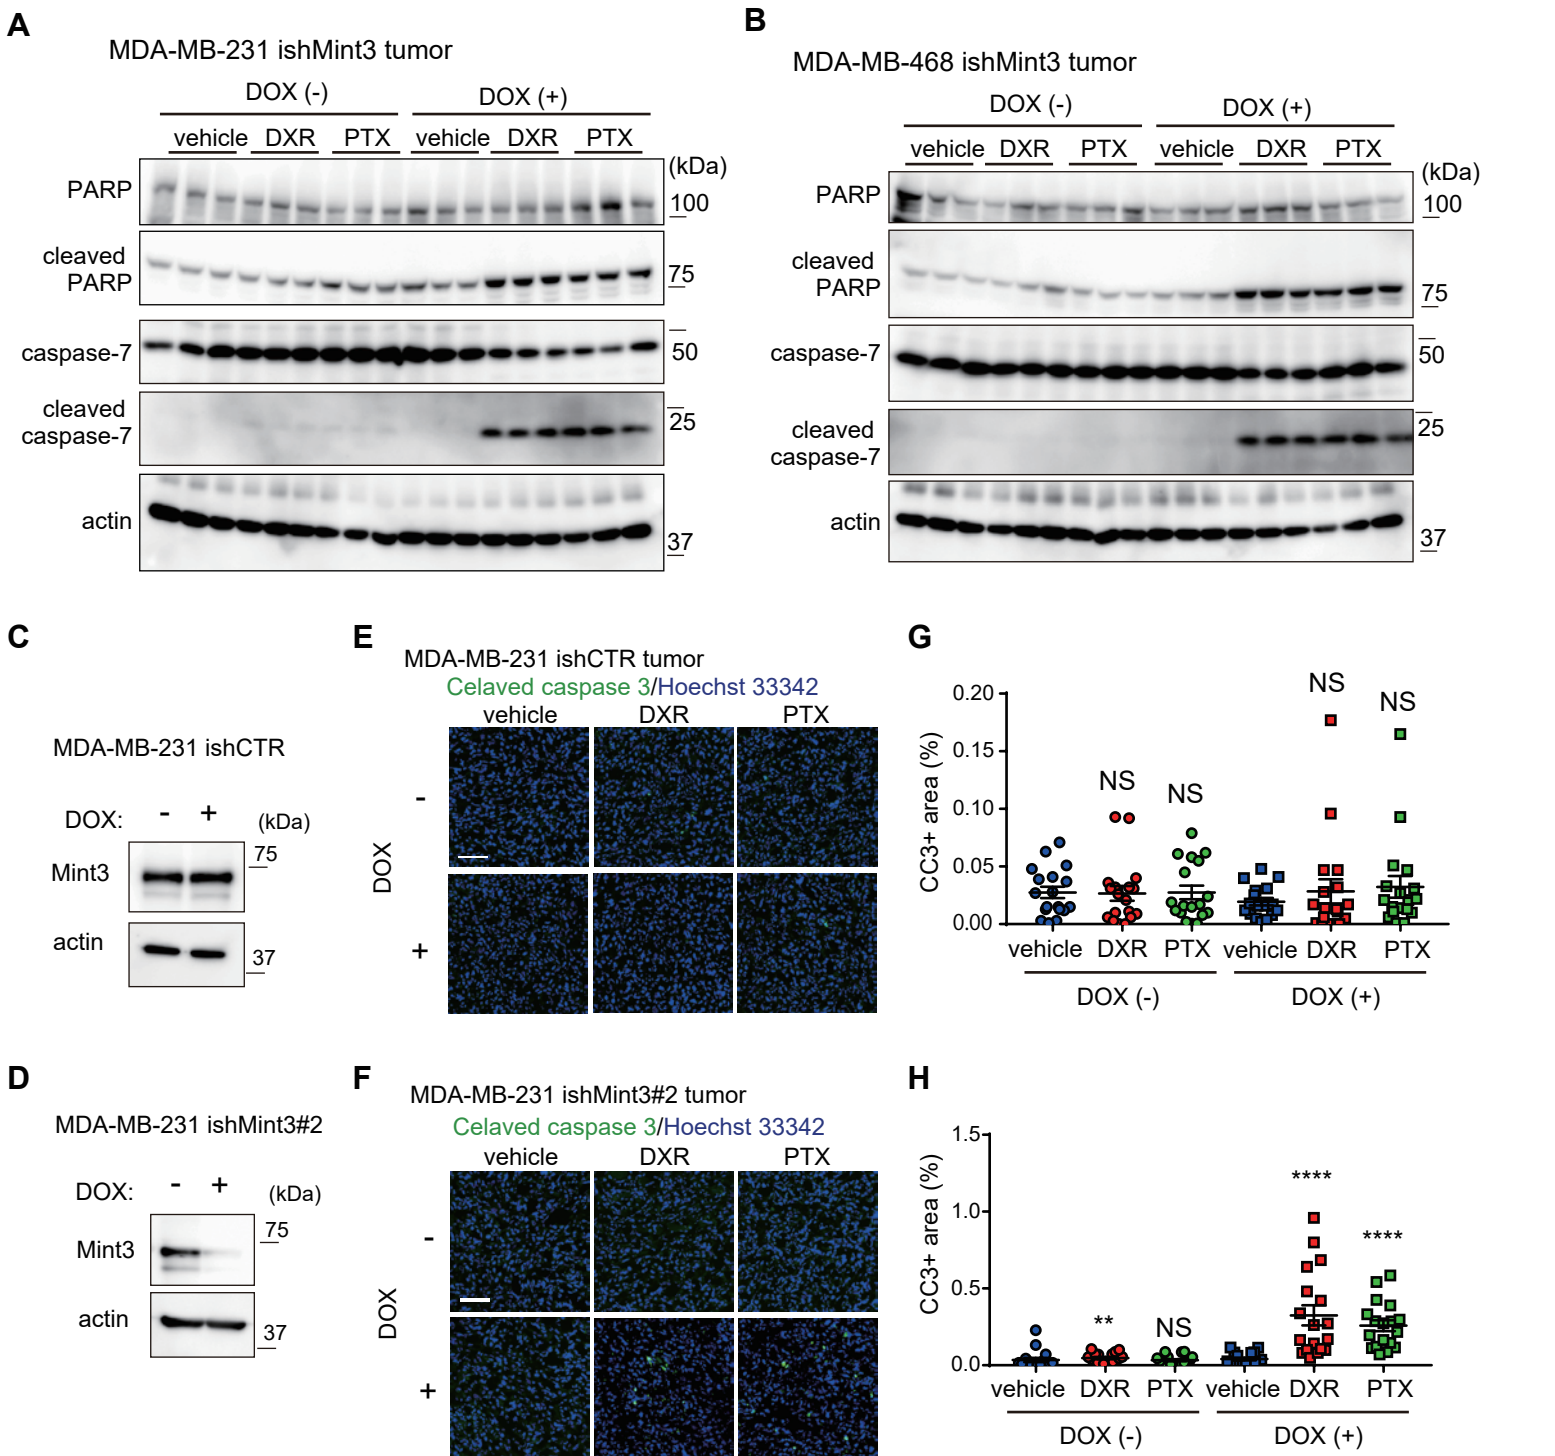

**Supplementary Fig. S1. Mint3 depletion sensitizes chemotherapy *in vivo* in MDA-MB-231 cells.**

**A, B** Immunoblotting of full-length and cleaved PARP and caspase-7 in tumors from MDA-MB-231 ishMint3#1 (**A**) and MDA-MB-468 ishMint3#1 (**B**) cells following four-day doxycycline (DOX) administration and one-shot chemotherapy with doxorubicin (DXR; 2 mg/kg b.w.) and paclitaxel (PTX; 20 mg/kg b.w.) 24 h before sacrifice, as illustrated in Fig. 2A.

**C, D** Expression of Mint3 in MDA-MB-231 cells expressing control shRNA (ishCTR) or shRNA against Mint3 with a different sequence from ishMint3 (ishMint3#2) treated with DOX (1  $\mu$ g/ml) for three days.

**E–H** Immunostaining for cleaved caspase-3 in tumors from MDA-MB-231 ishCTR (**E, G**) and ishMint3#2 (**F, H**) cells following four-day doxycycline (DOX) administration and one-shot chemotherapy with DXR and PTX 24 h before sacrifice, as illustrated in Fig. 2A. (**E, F**) Representative images are shown. (**G, H**) Cleaved caspase-3-positive areas were counted in the tumor sections.  $n = 18$  from six tumors per group. Data are presented as the mean  $\pm$  SEM and were analyzed using the Mann–Whitney U-test.

\*\* $p < 0.01$ , \*\*\*\* $p < 0.0001$ . NS, not significant.
