# Supplementary material for: Mint3-depletion-induced energy stress sensitizes triple-negative breast cancer to chemotherapy via HSF1 inactivation
Source: PubMed Central journal article supplement (PMC10713533; doi:10.1038/s41419-023-06352-4), 2023-12-11
Supplement: 41419_2023_6352_MOESM3_ESM.pdf [file 41419_2023_6352_MOESM3_ESM.pdf]

**A**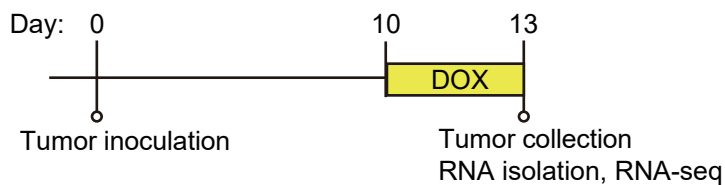**B**

| Rank | Gene     | log2 FC      | adjusted p value |
|------|----------|--------------|------------------|
| 1    | RSC1A1   | -1.183149837 | 0.007955842      |
| 2    | HCLS1    | -0.898211842 | 0.029852346      |
| 3    | ID2      | -0.871320171 | 0.027769149      |
| 4    | HSPA1A   | -0.829165386 | 0.002898218      |
| 5    | TNFSF18  | -0.784984533 | 0.00189841       |
| 6    | DGKI     | -0.703953292 | 0.033411853      |
| 7    | FSBP     | -0.678040422 | 0.031616898      |
| 8    | MAP3K7CL | -0.607979805 | 5.64E-05         |

Underrepresented genes in Mint3-depleted MDA-MB-231 tumors

**C**

| Rank | Gene    | log2 FC     | adjusted p value |
|------|---------|-------------|------------------|
| 1    | S100A4  | 0.633325175 | 5.38E-18         |
| 2    | IFI27   | 0.672891278 | 0.000140619      |
| 3    | SYT12   | 0.678921567 | 0.029852346      |
| 4    | ANXA8L1 | 0.72905626  | 0.043515559      |
| 5    | KRT17   | 1.004037298 | 1.70E-06         |
| 6    | KRCC1   | 1.078352498 | 0.003749548      |
| 7    | GATD3A  | 1.159826405 | 0.037626749      |
| 8    | PI16    | 1.221938956 | 0.043786295      |
| 9    | KRT14   | 1.390402905 | 0.008722136      |

Overrepresented genes in Mint3-depleted MDA-MB-231 tumors

**D**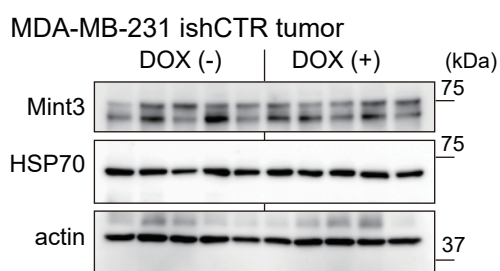**E**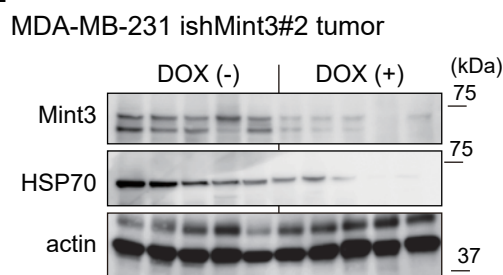**F**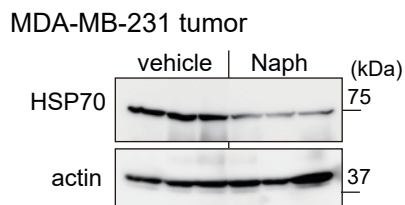

### Supplementary Fig. S2. Mint3 promotes HSP70 expression in tumors from MDA-MB-231 cells.

**A** Schematic illustration of the RNA-seq analysis of MDA-MB-231 ishMint3 tumors.

**B** List of underrepresented genes in Mint3-depleted MDA-MB-231 tumors.

**C** List of overrepresented genes in Mint3-depleted MDA-MB-231 tumors.

**D, E** Protein levels of Mint3 and HSP70 in tumors from MDA-MB-231 ishCTR (**D**) and ishMint3#2 cells (**E**) administered with or without doxycycline (DOX) for 3 days. n = 5 per group.

**F** Protein levels of HSP70 in tumors from MDA-MB-231 cells administered with or without naphthofluorescein (Naph) for three days. n = 3 per group.
