# Supplementary material for: Mint3-depletion-induced energy stress sensitizes triple-negative breast cancer to chemotherapy via HSF1 inactivation
Source: PubMed Central journal article supplement (PMC10713533; doi:10.1038/s41419-023-06352-4), 2023-12-11
Supplement: 41419_2023_6352_MOESM4_ESM.pdf [file 41419_2023_6352_MOESM4_ESM.pdf]

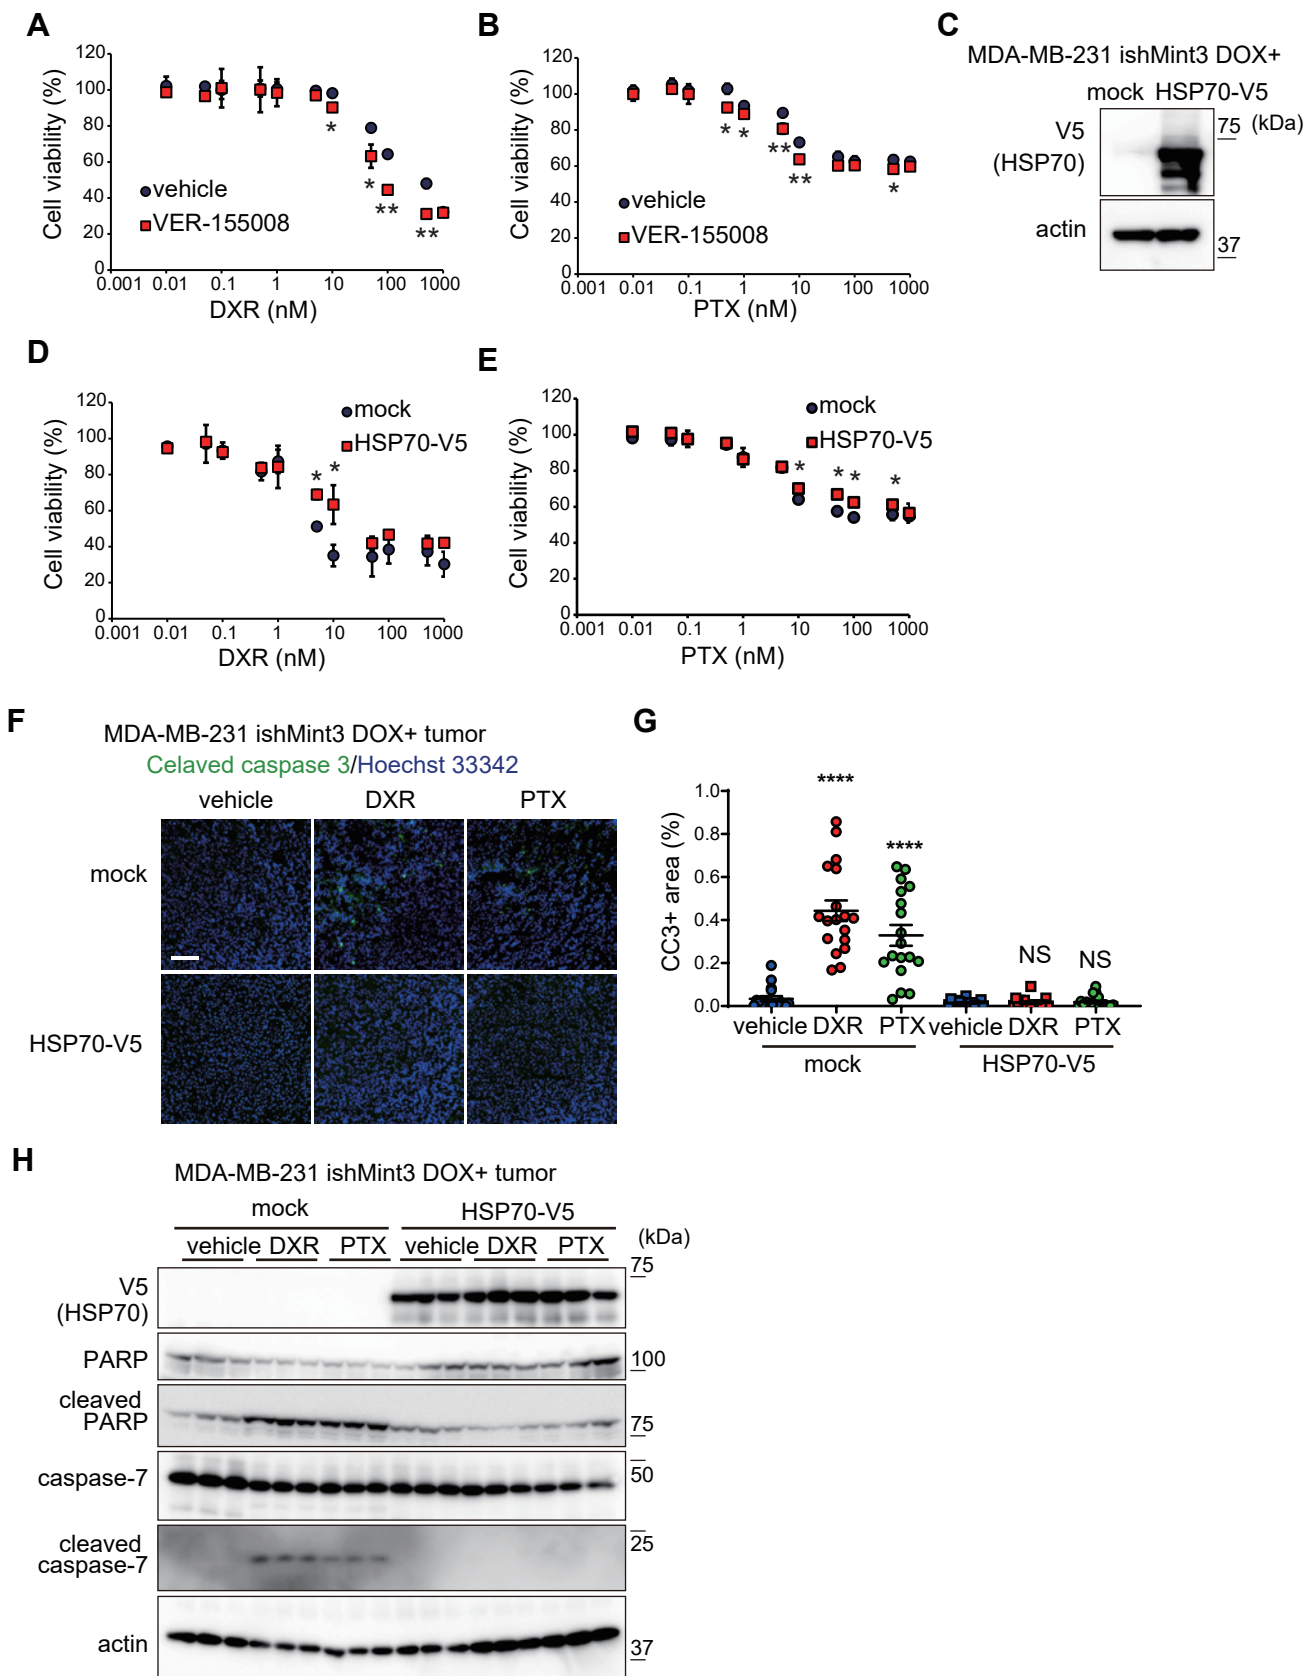

**Supplementary Fig. S3. HSP70 contributes to chemoresistance in MDA-MB-231 cells both *in vitro* and *in vivo*.**

**A, B** Cytotoxicity assay of MDA-MB-231 ishMint3 cells in the presence of doxorubicin (DXR) or paclitaxel (PTX) with or without VER-155008 (10  $\mu$ M) for 24 h at the indicated concentration.

**C** Immunoblotting of V5-tagged HSP70 in MDA-MB-231 ishMint3 cells transfected with mock or HSP70-V5 expressing lentiviral vectors in the presence of doxycycline (DOX).

**D, E** Cytotoxicity assay of MDA-MB-231 ishMint3 mock and HSP70-V5 cells in the presence of DXR or PTX with DOX for 24 h at the indicated concentrations.

**F, G** Immunostaining for cleaved caspase-3 in tumors derived from MDA-MB-231 ishMint3 mock and HSP70-V5 cells following four-day DOX administration, accompanied by a single-shot chemotherapeutic application of DXR and PTX 24 h before sacrifice. (F) representative photos. (G) Quantification of cleaved caspase-3-positive regions in the tumor sections, with n = 18, obtained from six tumors per group. All data are presented as the mean  $\pm$  SEM and were analyzed using the Mann-Whitney U-test.

\*\*\*\*p < 0.0001. NS: not significant.

For Panels **A, B, D, and E**, data are presented as the mean  $\pm$  SD (n = 3) and analyzed using the two-sided unpaired t-test with Welch's correction. \*p < 0.05, \*\*p < 0.01.
