# Supplementary material for: Mint3-depletion-induced energy stress sensitizes triple-negative breast cancer to chemotherapy via HSF1 inactivation
Source: PubMed Central journal article supplement (PMC10713533; doi:10.1038/s41419-023-06352-4), 2023-12-11
Supplement: 41419_2023_6352_MOESM6_ESM.pdf [file 41419_2023_6352_MOESM6_ESM.pdf]

MDA-MB-231 ishHIF-1 $\alpha$  tumor

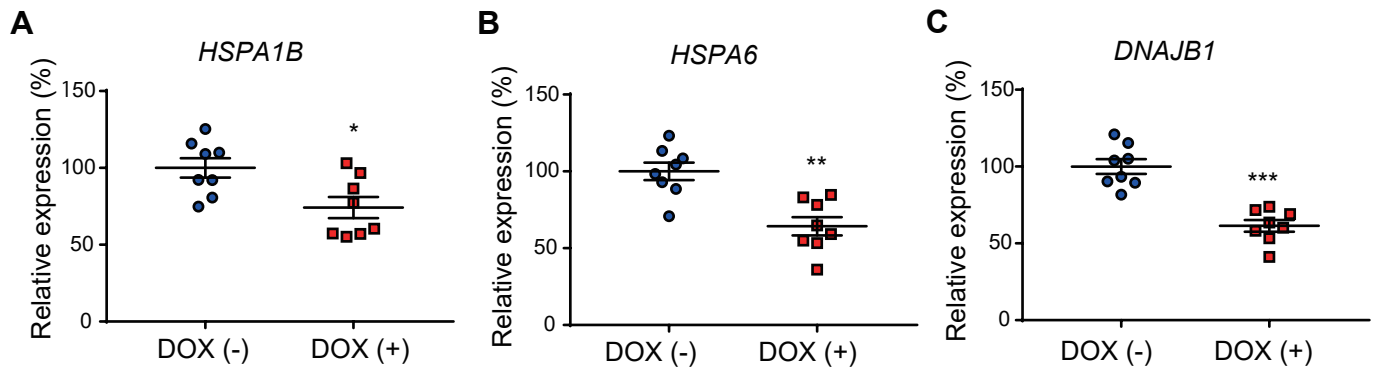

**Supplementary Fig. S5. HIF-1 promotes the expression of HSF-1 target genes in TNBC tumors.**

**A–C** mRNA levels of HSF1 target genes (*HSPA1B* (**A**), *HSPA6* (**B**), and *DNAJB1* (**C**)) in tumors of MDA-MB-231 ishHIF-1 $\alpha$  cells treated with or without doxycycline (DOX). Data are presented as the mean  $\pm$  SEM and were analyzed using the Mann–Whitney U-test. \* $p < 0.05$ , \*\* $p < 0.01$ , \*\*\* $p < 0.001$ .
