# Supplementary material for: Mint3-depletion-induced energy stress sensitizes triple-negative breast cancer to chemotherapy via HSF1 inactivation
Source: PubMed Central journal article supplement (PMC10713533; doi:10.1038/s41419-023-06352-4), 2023-12-11
Supplement: 41419_2023_6352_MOESM7_ESM.pdf [file 41419_2023_6352_MOESM7_ESM.pdf]

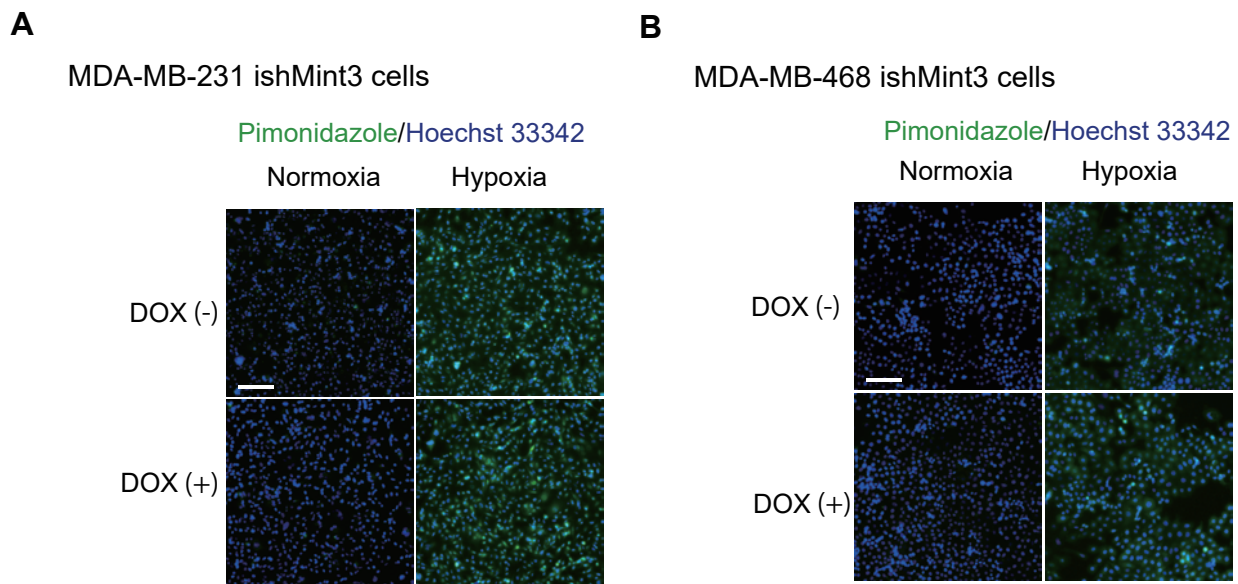

**Supplementary Fig. S6. Mint3 depletion did not induce hypoxia *in vitro* in MDA-MB-231 and MDA-MB-468 cells.** Immunostaining of pimonidazole (green) in MDA-MB-231 ishMint3#1 (**A**) and MDA-MB-468 ishMint3#1 (**B**) cells, with or without doxycycline (DOX), cultured under normoxic or hypoxic conditions for 3 h in the presence of pimonidazole (100  $\mu$ M). Nuclei were counterstained with Hoechst 33342 (blue). Scale bar = 100  $\mu$ m.
