# Supplementary material for: Mint3-depletion-induced energy stress sensitizes triple-negative breast cancer to chemotherapy via HSF1 inactivation
Source: PubMed Central journal article supplement (PMC10713533; doi:10.1038/s41419-023-06352-4), 2023-12-11
Supplement: 41419_2023_6352_MOESM9_ESM.pdf [file 41419_2023_6352_MOESM9_ESM.pdf]

MDA-MB-231 cells

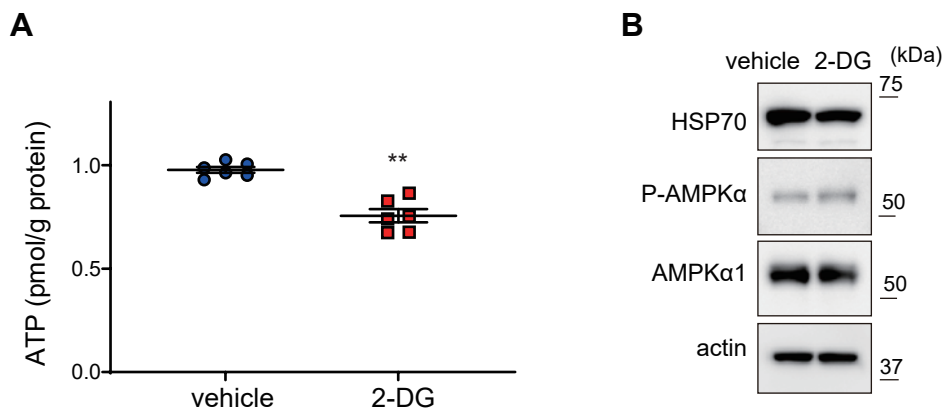

**Supplementary Fig. S8. 2-DG partially decreases ATP levels in MDA-MB-231 cells**

**A, B** MDA-MB-231 cells were treated with or without 2-DG (1 mM) for 6 h, and ATP levels (**A**) and protein expression (**B**) were analyzed. (**A**) ATP levels in MDA-MB-231 cells.  $n = 6$  per group. Data are represented as the mean  $\pm$  SEM and analyzed using the Mann-Whitney U-test.  $**p < 0.01$ ,  $***p < 0.001$ ,  $****p < 0.0001$ . NS: not significant. (**B**) protein expression of HSP70, P-AMPK $\alpha$ , and AMPK $\alpha$ 1 in MDA-MB-231 cells.
